# Supplementary material for: Mining the entire Protein DataBank for frequent spatially cohesive amino acid patterns
Source: Springer Nature journal article supplement (doi:10.1186/s13040-015-0038-4), 2015-01-30

**Additional file 10:** Patterns mined from protein structure sets with lower redundancy.

Three sets of protein molecular structures were obtained from PDB, each with a different degree of redundancy. The non-redundant set of protein chains was obtained from the nr-PDB collection on the VAST website and is based on a maximal BLAST similarity p-value of either  $1 \cdot 10^{-80}$  (32 142 proteins),  $1 \cdot 10^{-40}$  (22 694 proteins), or  $1 \cdot 10^{-7}$  (13 176 proteins). Higher p-value cutoffs signify lower redundancy, as more protein structures will be excluded. Each set of structures was mined for FreSCOs with a maximum cohesive radius of 4.5 Å and a minimal support of 0.60. As can be seen in table 10.1, the results for the cohesion and frequency of a given FreSCO are highly similar between the data sets and are therefore largely independent of the redundancy in the data set. For example, the Pearson correlation between the cohesion radius of a FreSCO in the 1E-80 set and the 1E-7 set is 0.9990. The significance of each found pattern was separately then independently estimated as described in the materials and methods against the data set of origin. So the cohesion radius of a FreSCO from the 1E-7 data set is compared against the cohesion radiuses from several permuted versions of the same data set. This results in three lists of FreSCOs, one for each data set, which have cohesion radiuses that are significantly smaller than those from the permuted sets. As can be seen in figure 10.1, almost all of these significant FreSCOs are shared in the result from all three data sets. The assigned P-values were also highly correlated among the shared significant FreSCOs. For example, the Spearman rank correlation between the P-values from the 1E-80 and 1E-7 FreSCOs was 0.7126.

**Table 10.1:** Cohesive radius and frequency for FreSCOs mined with a cohesion radius  $< 4.5$  Å and a support  $> 0.60$  in all three data sets. The single amino acid FreSCOs have also been included here to illustrate the difference in amino acid frequency between the data sets.

| FreSCO | 1E-80 redundancy |           | 1E-40 redundancy |           | 1E-7 redundancy |           |
|--------|------------------|-----------|------------------|-----------|-----------------|-----------|
|        | Cohesion         | Frequency | Cohesion         | Frequency | Cohesion        | Frequency |
| ILE    | 0.000            | 0.964     | 0.000            | 0.954     | 0.000           | 0.948     |
| VAL    | 0.000            | 0.970     | 0.000            | 0.958     | 0.000           | 0.954     |
| TYR    | 0.000            | 0.933     | 0.000            | 0.915     | 0.000           | 0.904     |
| MET    | 0.000            | 0.721     | 0.000            | 0.676     | 0.000           | 0.650     |
| ALA    | 0.000            | 0.981     | 0.000            | 0.974     | 0.000           | 0.969     |
| HIS    | 0.000            | 0.871     | 0.000            | 0.851     | 0.000           | 0.852     |
| LYS    | 0.000            | 0.974     | 0.000            | 0.967     | 0.000           | 0.960     |
| LEU    | 0.000            | 0.987     | 0.000            | 0.982     | 0.000           | 0.976     |
| ARG    | 0.000            | 0.969     | 0.000            | 0.962     | 0.000           | 0.959     |
| CYS    | 0.000            | 0.715     | 0.000            | 0.695     | 0.000           | 0.690     |
| ASP    | 0.000            | 0.968     | 0.000            | 0.955     | 0.000           | 0.948     |
| ASN    | 0.000            | 0.956     | 0.000            | 0.942     | 0.000           | 0.932     |
| GLY    | 0.000            | 0.979     | 0.000            | 0.972     | 0.000           | 0.966     |
| SER    | 0.000            | 0.977     | 0.000            | 0.972     | 0.000           | 0.970     |

|         |       |       |       |       |       |       |
|---------|-------|-------|-------|-------|-------|-------|
| GLU     | 0.000 | 0.978 | 0.000 | 0.970 | 0.000 | 0.962 |
| PRO     | 0.000 | 0.946 | 0.000 | 0.930 | 0.000 | 0.928 |
| GLN     | 0.000 | 0.954 | 0.000 | 0.941 | 0.000 | 0.933 |
| PHE     | 0.000 | 0.943 | 0.000 | 0.923 | 0.000 | 0.920 |
| THR     | 0.000 | 0.970 | 0.000 | 0.958 | 0.000 | 0.951 |
| TRP     | 0.000 | 0.739 | 0.000 | 0.719 | 0.000 | 0.728 |
| ALA-LEU | 2.206 | 0.972 | 2.246 | 0.961 | 2.225 | 0.952 |
| LEU-VAL | 2.214 | 0.962 | 2.253 | 0.947 | 2.239 | 0.941 |
| GLU-LEU | 2.223 | 0.970 | 2.248 | 0.959 | 2.226 | 0.949 |
| LEU-LYS | 2.236 | 0.964 | 2.275 | 0.953 | 2.258 | 0.943 |
| LEU-SER | 2.288 | 0.967 | 2.332 | 0.958 | 2.298 | 0.953 |
| GLY-LEU | 2.295 | 0.968 | 2.339 | 0.956 | 2.321 | 0.947 |
| ILE-LEU | 2.309 | 0.956 | 2.335 | 0.944 | 2.292 | 0.936 |
| LEU-THR | 2.310 | 0.961 | 2.368 | 0.946 | 2.344 | 0.936 |
| ALA-VAL | 2.325 | 0.957 | 2.374 | 0.940 | 2.374 | 0.934 |
| ALA-GLU | 2.326 | 0.964 | 2.354 | 0.950 | 2.349 | 0.940 |
| ASP-LEU | 2.337 | 0.960 | 2.379 | 0.944 | 2.322 | 0.934 |
| ARG-LEU | 2.337 | 0.960 | 2.355 | 0.949 | 2.318 | 0.943 |
| GLU-VAL | 2.339 | 0.954 | 2.365 | 0.937 | 2.355 | 0.930 |
| LYS-VAL | 2.372 | 0.949 | 2.437 | 0.934 | 2.439 | 0.925 |
| ALA-LYS | 2.375 | 0.959 | 2.432 | 0.947 | 2.422 | 0.936 |
| GLU-LYS | 2.376 | 0.957 | 2.409 | 0.944 | 2.407 | 0.932 |
| GLU-GLY | 2.383 | 0.961 | 2.423 | 0.946 | 2.427 | 0.935 |
| ILE-VAL | 2.404 | 0.943 | 2.461 | 0.925 | 2.454 | 0.920 |
| GLY-LYS | 2.420 | 0.955 | 2.483 | 0.942 | 2.514 | 0.932 |
| ALA-ILE | 2.422 | 0.951 | 2.469 | 0.937 | 2.429 | 0.928 |
| ALA-GLY | 2.424 | 0.964 | 2.486 | 0.951 | 2.492 | 0.942 |
| GLY-VAL | 2.434 | 0.956 | 2.510 | 0.940 | 2.542 | 0.933 |
| GLU-SER | 2.455 | 0.959 | 2.479 | 0.947 | 2.466 | 0.941 |
| ALA-SER | 2.457 | 0.962 | 2.497 | 0.951 | 2.469 | 0.947 |
| ASP-VAL | 2.459 | 0.948 | 2.514 | 0.927 | 2.494 | 0.920 |
| GLY-SER | 2.460 | 0.960 | 2.504 | 0.949 | 2.477 | 0.944 |
| THR-VAL | 2.462 | 0.949 | 2.534 | 0.930 | 2.525 | 0.923 |
| GLN-LEU | 2.466 | 0.946 | 2.498 | 0.930 | 2.449 | 0.920 |
| ARG-VAL | 2.471 | 0.945 | 2.516 | 0.928 | 2.502 | 0.925 |
| LEU-PHE | 2.471 | 0.936 | 2.482 | 0.915 | 2.451 | 0.910 |
| GLU-ILE | 2.473 | 0.949 | 2.479 | 0.934 | 2.450 | 0.924 |
| SER-VAL | 2.473 | 0.953 | 2.512 | 0.939 | 2.499 | 0.936 |
| ASN-LEU | 2.475 | 0.947 | 2.514 | 0.931 | 2.479 | 0.918 |
| ALA-ASP | 2.478 | 0.956 | 2.544 | 0.938 | 2.511 | 0.928 |
| ARG-GLU | 2.482 | 0.953 | 2.475 | 0.939 | 2.447 | 0.931 |
| GLU-THR | 2.491 | 0.954 | 2.526 | 0.937 | 2.498 | 0.926 |
| ALA-THR | 2.511 | 0.956 | 2.583 | 0.940 | 2.550 | 0.931 |
| ALA-ARG | 2.528 | 0.955 | 2.555 | 0.943 | 2.541 | 0.937 |
| LEU-TYR | 2.531 | 0.926 | 2.553 | 0.905 | 2.500 | 0.892 |

|         |       |       |       |       |       |       |
|---------|-------|-------|-------|-------|-------|-------|
| ASP-GLU | 2.534 | 0.955 | 2.526 | 0.938 | 2.510 | 0.929 |
| LEU-PRO | 2.544 | 0.935 | 2.547 | 0.916 | 2.501 | 0.909 |
| ASP-LYS | 2.545 | 0.949 | 2.580 | 0.932 | 2.589 | 0.921 |
| GLY-ILE | 2.547 | 0.948 | 2.592 | 0.933 | 2.593 | 0.925 |
| ASP-GLY | 2.548 | 0.953 | 2.638 | 0.935 | 2.608 | 0.926 |
| GLY-THR | 2.556 | 0.955 | 2.630 | 0.939 | 2.661 | 0.929 |
| ILE-LYS | 2.565 | 0.944 | 2.607 | 0.930 | 2.596 | 0.920 |
| ARG-GLY | 2.572 | 0.952 | 2.615 | 0.939 | 2.626 | 0.933 |
| ARG-ILE | 2.573 | 0.940 | 2.592 | 0.924 | 2.573 | 0.919 |
| ILE-THR | 2.574 | 0.943 | 2.647 | 0.926 | 2.639 | 0.917 |
| PHE-VAL | 2.583 | 0.925 | 2.627 | 0.899 | 2.638 | 0.896 |
| ILE-SER | 2.587 | 0.946 | 2.626 | 0.933 | 2.597 | 0.929 |
| LYS-SER | 2.597 | 0.956 | 2.627 | 0.946 | 2.626 | 0.939 |
| LYS-THR | 2.600 | 0.949 | 2.679 | 0.934 | 2.683 | 0.923 |
| ASP-SER | 2.603 | 0.951 | 2.643 | 0.936 | 2.611 | 0.930 |
| ASP-ILE | 2.605 | 0.942 | 2.646 | 0.923 | 2.602 | 0.914 |
| SER-THR | 2.645 | 0.953 | 2.700 | 0.939 | 2.671 | 0.933 |
| ARG-LYS | 2.646 | 0.948 | 2.671 | 0.936 | 2.630 | 0.928 |
| ALA-PHE | 2.647 | 0.931 | 2.655 | 0.908 | 2.639 | 0.902 |
| ASP-THR | 2.655 | 0.946 | 2.734 | 0.926 | 2.700 | 0.917 |
| ARG-ASP | 2.661 | 0.945 | 2.712 | 0.927 | 2.675 | 0.921 |
| GLU-PHE | 2.666 | 0.930 | 2.677 | 0.906 | 2.662 | 0.900 |
| ALA-ASN | 2.678 | 0.943 | 2.732 | 0.926 | 2.717 | 0.913 |
| ALA-GLN | 2.682 | 0.942 | 2.732 | 0.924 | 2.673 | 0.915 |
| GLN-VAL | 2.682 | 0.934 | 2.729 | 0.913 | 2.709 | 0.906 |
| TYR-VAL | 2.689 | 0.914 | 2.740 | 0.889 | 2.732 | 0.880 |
| ASN-VAL | 2.693 | 0.936 | 2.762 | 0.916 | 2.765 | 0.905 |
| ARG-SER | 2.697 | 0.952 | 2.715 | 0.941 | 2.658 | 0.937 |
| PRO-VAL | 2.701 | 0.927 | 2.741 | 0.905 | 2.733 | 0.901 |
| GLY-PRO | 2.714 | 0.935 | 2.778 | 0.916 | 2.797 | 0.911 |
| ALA-PRO | 2.724 | 0.932 | 2.772 | 0.912 | 2.761 | 0.906 |
| GLY-PHE | 2.729 | 0.931 | 2.791 | 0.908 | 2.805 | 0.902 |
| ARG-THR | 2.735 | 0.946 | 2.795 | 0.930 | 2.756 | 0.923 |
| ASN-GLU | 2.740 | 0.943 | 2.752 | 0.925 | 2.721 | 0.913 |
| HIS-LEU | 2.742 | 0.867 | 2.737 | 0.844 | 2.697 | 0.844 |
| GLN-GLU | 2.742 | 0.941 | 2.736 | 0.923 | 2.677 | 0.913 |
| ALA-TYR | 2.757 | 0.922 | 2.783 | 0.899 | 2.752 | 0.887 |
| CYS-LEU | 2.774 | 0.708 | 2.784 | 0.685 | 2.771 | 0.678 |
| PRO-SER | 2.774 | 0.930 | 2.778 | 0.912 | 2.752 | 0.909 |
| GLU-PRO | 2.778 | 0.931 | 2.735 | 0.909 | 2.717 | 0.903 |
| PHE-SER | 2.780 | 0.928 | 2.797 | 0.906 | 2.787 | 0.905 |
| ASN-GLY | 2.784 | 0.940 | 2.869 | 0.922 | 2.869 | 0.910 |
| ILE-PHE | 2.791 | 0.919 | 2.849 | 0.896 | 2.812 | 0.891 |
| LYS-PHE | 2.804 | 0.924 | 2.845 | 0.901 | 2.865 | 0.894 |
| GLU-TYR | 2.816 | 0.921 | 2.814 | 0.898 | 2.782 | 0.886 |

|         |       |       |       |       |       |       |
|---------|-------|-------|-------|-------|-------|-------|
| LYS-PRO | 2.819 | 0.926 | 2.864 | 0.906 | 2.891 | 0.899 |
| GLN-GLY | 2.832 | 0.939 | 2.935 | 0.920 | 2.887 | 0.910 |
| GLN-ILE | 2.833 | 0.928 | 2.881 | 0.909 | 2.840 | 0.899 |
| GLN-LYS | 2.849 | 0.935 | 2.890 | 0.918 | 2.857 | 0.906 |
| ASN-ILE | 2.852 | 0.929 | 2.918 | 0.910 | 2.902 | 0.899 |
| GLY-TYR | 2.857 | 0.922 | 2.924 | 0.899 | 2.919 | 0.887 |
| PHE-THR | 2.862 | 0.926 | 2.912 | 0.901 | 2.914 | 0.896 |
| ILE-TYR | 2.863 | 0.910 | 2.905 | 0.887 | 2.870 | 0.877 |
| ASP-PHE | 2.864 | 0.924 | 2.880 | 0.897 | 2.844 | 0.893 |
| ASP-PRO | 2.868 | 0.924 | 2.919 | 0.900 | 2.895 | 0.895 |
| ASN-LYS | 2.869 | 0.938 | 2.941 | 0.921 | 2.937 | 0.906 |
| PRO-THR | 2.873 | 0.928 | 2.956 | 0.907 | 2.955 | 0.900 |
| ARG-PHE | 2.883 | 0.922 | 2.885 | 0.899 | 2.870 | 0.897 |
| LEU-MET | 2.890 | 0.716 | 2.944 | 0.669 | 2.919 | 0.642 |
| LYS-TYR | 2.913 | 0.915 | 2.979 | 0.894 | 2.970 | 0.881 |
| ASN-ASP | 2.925 | 0.936 | 3.016 | 0.915 | 2.976 | 0.904 |
| ARG-ASN | 2.930 | 0.933 | 2.964 | 0.915 | 2.924 | 0.905 |
| GLN-SER | 2.936 | 0.937 | 2.961 | 0.921 | 2.899 | 0.914 |
| ASN-SER | 2.939 | 0.940 | 2.993 | 0.924 | 2.958 | 0.915 |
| ILE-PRO | 2.944 | 0.918 | 2.958 | 0.896 | 2.925 | 0.891 |
| SER-TYR | 2.948 | 0.918 | 2.983 | 0.897 | 2.950 | 0.888 |
| ARG-GLN | 2.968 | 0.931 | 2.994 | 0.914 | 2.920 | 0.906 |
| ASP-TYR | 2.970 | 0.915 | 3.019 | 0.890 | 2.975 | 0.879 |
| LEU-TRP | 2.980 | 0.734 | 2.976 | 0.713 | 2.931 | 0.722 |
| CYS-VAL | 2.980 | 0.702 | 3.007 | 0.676 | 3.053 | 0.672 |
| ASN-THR | 2.981 | 0.935 | 3.096 | 0.914 | 3.056 | 0.902 |
| GLN-THR | 2.983 | 0.932 | 3.048 | 0.911 | 3.000 | 0.901 |
| ARG-TYR | 2.987 | 0.913 | 2.993 | 0.891 | 2.938 | 0.882 |
| ASP-GLN | 2.987 | 0.932 | 3.036 | 0.910 | 2.961 | 0.901 |
| THR-TYR | 3.004 | 0.916 | 3.080 | 0.891 | 3.052 | 0.880 |
| ALA-CYS | 3.005 | 0.706 | 3.032 | 0.682 | 3.087 | 0.675 |
| ARG-PRO | 3.023 | 0.925 | 3.060 | 0.905 | 3.053 | 0.902 |
| ALA-HIS | 3.050 | 0.862 | 3.068 | 0.838 | 3.056 | 0.838 |
| HIS-VAL | 3.069 | 0.857 | 3.099 | 0.832 | 3.099 | 0.833 |
| CYS-GLY | 3.133 | 0.710 | 3.160 | 0.688 | 3.260 | 0.682 |
| ALA-MET | 3.139 | 0.713 | 3.211 | 0.665 | 3.169 | 0.639 |
| MET-VAL | 3.154 | 0.709 | 3.211 | 0.660 | 3.233 | 0.634 |
| GLN-PHE | 3.164 | 0.908 | 3.199 | 0.881 | 3.175 | 0.874 |
| ASN-PHE | 3.170 | 0.912 | 3.227 | 0.886 | 3.209 | 0.879 |
| GLU-HIS | 3.173 | 0.863 | 3.108 | 0.839 | 3.058 | 0.837 |
| PHE-TYR | 3.184 | 0.895 | 3.179 | 0.865 | 3.147 | 0.857 |
| ASN-PRO | 3.204 | 0.912 | 3.243 | 0.887 | 3.207 | 0.878 |
| GLY-HIS | 3.212 | 0.861 | 3.232 | 0.837 | 3.240 | 0.837 |
| HIS-ILE | 3.220 | 0.850 | 3.211 | 0.825 | 3.196 | 0.828 |
| PHE-PRO | 3.224 | 0.907 | 3.194 | 0.880 | 3.195 | 0.875 |

|             |       |       |       |       |       |       |
|-------------|-------|-------|-------|-------|-------|-------|
| GLU-MET     | 3.233 | 0.712 | 3.218 | 0.664 | 3.226 | 0.637 |
| TRP-VAL     | 3.234 | 0.729 | 3.254 | 0.706 | 3.231 | 0.715 |
| CYS-ILE     | 3.276 | 0.695 | 3.275 | 0.670 | 3.279 | 0.664 |
| CYS-GLU     | 3.279 | 0.705 | 3.267 | 0.681 | 3.270 | 0.674 |
| LYS-MET     | 3.294 | 0.709 | 3.373 | 0.662 | 3.382 | 0.634 |
| HIS-SER     | 3.299 | 0.861 | 3.259 | 0.840 | 3.235 | 0.841 |
| ALA-TRP     | 3.302 | 0.732 | 3.319 | 0.710 | 3.290 | 0.718 |
| PRO-TYR     | 3.305 | 0.896 | 3.328 | 0.869 | 3.307 | 0.860 |
| GLN-PRO     | 3.306 | 0.910 | 3.359 | 0.885 | 3.295 | 0.879 |
| ASN-GLN     | 3.316 | 0.922 | 3.353 | 0.901 | 3.305 | 0.887 |
| CYS-SER     | 3.328 | 0.707 | 3.344 | 0.685 | 3.345 | 0.681 |
| ILE-MET     | 3.333 | 0.704 | 3.434 | 0.656 | 3.404 | 0.630 |
| HIS-LYS     | 3.339 | 0.857 | 3.386 | 0.834 | 3.366 | 0.832 |
| GLY-MET     | 3.340 | 0.711 | 3.416 | 0.663 | 3.382 | 0.636 |
| GLN-TYR     | 3.348 | 0.901 | 3.401 | 0.874 | 3.312 | 0.863 |
| ASN-TYR     | 3.374 | 0.905 | 3.420 | 0.879 | 3.380 | 0.866 |
| GLU-TRP     | 3.380 | 0.732 | 3.334 | 0.711 | 3.290 | 0.718 |
| CYS-THR     | 3.388 | 0.705 | 3.440 | 0.680 | 3.469 | 0.673 |
| MET-SER     | 3.390 | 0.710 | 3.436 | 0.664 | 3.369 | 0.640 |
| GLY-TRP     | 3.396 | 0.732 | 3.443 | 0.711 | 3.462 | 0.719 |
| HIS-THR     | 3.401 | 0.857 | 3.431 | 0.830 | 3.421 | 0.831 |
| ASP-HIS     | 3.448 | 0.856 | 3.443 | 0.829 | 3.357 | 0.830 |
| ARG-HIS     | 3.471 | 0.857 | 3.446 | 0.835 | 3.384 | 0.835 |
| ASP-CYS     | 3.472 | 0.701 | 3.465 | 0.675 | 3.475 | 0.670 |
| ASP-MET     | 3.480 | 0.709 | 3.533 | 0.659 | 3.490 | 0.630 |
| MET-THR     | 3.519 | 0.707 | 3.589 | 0.657 | 3.577 | 0.631 |
| ALA-LEU-VAL | 3.520 | 0.950 | 3.586 | 0.932 | 3.562 | 0.924 |
| ILE-TRP     | 3.527 | 0.724 | 3.544 | 0.703 | 3.513 | 0.709 |
| LYS-TRP     | 3.531 | 0.726 | 3.552 | 0.704 | 3.528 | 0.710 |
| CYS-LYS     | 3.533 | 0.702 | 3.571 | 0.679 | 3.604 | 0.671 |
| ARG-CYS     | 3.534 | 0.701 | 3.526 | 0.679 | 3.530 | 0.672 |
| ARG-MET     | 3.558 | 0.705 | 3.570 | 0.658 | 3.549 | 0.633 |
| SER-TRP     | 3.563 | 0.728 | 3.580 | 0.707 | 3.514 | 0.719 |
| ALA-GLU-LEU | 3.570 | 0.958 | 3.598 | 0.942 | 3.560 | 0.930 |
| CYS-PHE     | 3.593 | 0.691 | 3.586 | 0.663 | 3.637 | 0.657 |
| ASP-TRP     | 3.604 | 0.730 | 3.605 | 0.706 | 3.571 | 0.715 |
| GLU-LEU-VAL | 3.613 | 0.949 | 3.646 | 0.930 | 3.619 | 0.922 |
| ARG-TRP     | 3.634 | 0.726 | 3.614 | 0.704 | 3.550 | 0.714 |
| ALA-LEU-LYS | 3.636 | 0.951 | 3.687 | 0.936 | 3.663 | 0.924 |
| GLU-LEU-LYS | 3.650 | 0.950 | 3.679 | 0.935 | 3.651 | 0.922 |
| ALA-ILE-LEU | 3.652 | 0.945 | 3.692 | 0.928 | 3.631 | 0.919 |
| ILE-LEU-VAL | 3.669 | 0.938 | 3.722 | 0.918 | 3.686 | 0.912 |
| HIS-PHE     | 3.675 | 0.840 | 3.628 | 0.810 | 3.615 | 0.814 |
| LEU-LYS-VAL | 3.700 | 0.943 | 3.738 | 0.925 | 3.712 | 0.914 |
| THR-TRP     | 3.700 | 0.728 | 3.713 | 0.706 | 3.685 | 0.713 |

|             |       |       |       |       |       |       |
|-------------|-------|-------|-------|-------|-------|-------|
| ALA-GLY-LEU | 3.728 | 0.956 | 3.796 | 0.940 | 3.780 | 0.928 |
| ALA-LEU-SER | 3.757 | 0.955 | 3.808 | 0.941 | 3.752 | 0.934 |
| GLU-ILE-LEU | 3.758 | 0.944 | 3.755 | 0.927 | 3.706 | 0.917 |
| GLY-LEU-VAL | 3.765 | 0.949 | 3.840 | 0.930 | 3.835 | 0.922 |
| ARG-GLU-LEU | 3.776 | 0.947 | 3.776 | 0.931 | 3.710 | 0.922 |
| LEU-THR-VAL | 3.785 | 0.943 | 3.853 | 0.922 | 3.812 | 0.913 |
| ALA-ARG-LEU | 3.785 | 0.948 | 3.813 | 0.933 | 3.765 | 0.925 |
| ALA-LEU-THR | 3.786 | 0.949 | 3.856 | 0.930 | 3.800 | 0.919 |
| ALA-GLU-VAL | 3.789 | 0.944 | 3.825 | 0.923 | 3.826 | 0.915 |
| LEU-SER-VAL | 3.790 | 0.947 | 3.831 | 0.930 | 3.795 | 0.926 |
| ARG-LEU-VAL | 3.794 | 0.939 | 3.821 | 0.921 | 3.777 | 0.915 |
| ALA-ASP-LEU | 3.803 | 0.949 | 3.860 | 0.929 | 3.786 | 0.918 |
| HIS-PRO     | 3.805 | 0.841 | 3.763 | 0.813 | 3.747 | 0.816 |
| ALA-ILE-VAL | 3.811 | 0.933 | 3.874 | 0.911 | 3.865 | 0.906 |
| ASP-LEU-VAL | 3.812 | 0.942 | 3.857 | 0.920 | 3.793 | 0.911 |
| MET-PHE     | 3.813 | 0.692 | 3.885 | 0.639 | 3.906 | 0.617 |
| GLU-LEU-SER | 3.818 | 0.953 | 3.847 | 0.939 | 3.797 | 0.931 |
| GLU-GLY-LEU | 3.818 | 0.954 | 3.863 | 0.937 | 3.837 | 0.925 |
| ASN-HIS     | 3.822 | 0.847 | 3.855 | 0.820 | 3.843 | 0.818 |
| HIS-TYR     | 3.845 | 0.832 | 3.829 | 0.803 | 3.807 | 0.802 |
| ILE-LEU-LYS | 3.845 | 0.937 | 3.884 | 0.921 | 3.843 | 0.909 |
| CYS-PRO     | 3.846 | 0.698 | 3.829 | 0.674 | 3.887 | 0.667 |
| GLU-LEU-THR | 3.847 | 0.948 | 3.898 | 0.929 | 3.846 | 0.917 |
| GLY-LEU-LYS | 3.853 | 0.947 | 3.924 | 0.931 | 3.934 | 0.917 |
| ALA-GLU-LYS | 3.868 | 0.945 | 3.933 | 0.928 | 3.920 | 0.914 |
| ALA-LYS-VAL | 3.888 | 0.938 | 3.967 | 0.919 | 3.971 | 0.909 |
| CYS-TYR     | 3.893 | 0.687 | 3.885 | 0.660 | 3.894 | 0.650 |
| GLU-LYS-VAL | 3.894 | 0.937 | 3.940 | 0.917 | 3.928 | 0.907 |
| ARG-ILE-LEU | 3.894 | 0.934 | 3.914 | 0.917 | 3.851 | 0.910 |
| GLY-ILE-LEU | 3.895 | 0.942 | 3.945 | 0.924 | 3.911 | 0.914 |
| ILE-LEU-THR | 3.899 | 0.937 | 3.966 | 0.918 | 3.929 | 0.908 |
| ASP-LEU-LYS | 3.899 | 0.942 | 3.939 | 0.923 | 3.899 | 0.910 |
| ILE-LEU-SER | 3.909 | 0.940 | 3.942 | 0.925 | 3.889 | 0.919 |
| ALA-LEU-PHE | 3.918 | 0.926 | 3.935 | 0.902 | 3.890 | 0.895 |
| PHE-TRP     | 3.918 | 0.719 | 3.922 | 0.693 | 3.902 | 0.701 |
| ASN-CYS     | 3.919 | 0.695 | 3.974 | 0.670 | 4.004 | 0.663 |
| GLY-LEU-SER | 3.921 | 0.951 | 3.988 | 0.937 | 3.943 | 0.930 |
| ASP-GLU-LEU | 3.922 | 0.949 | 3.914 | 0.929 | 3.867 | 0.920 |
| GLN-HIS     | 3.923 | 0.845 | 3.910 | 0.819 | 3.844 | 0.818 |
| LEU-PHE-VAL | 3.926 | 0.921 | 3.952 | 0.893 | 3.932 | 0.889 |
| ALA-GLY-VAL | 3.939 | 0.944 | 4.016 | 0.924 | 4.039 | 0.916 |
| ALA-GLU-ILE | 3.941 | 0.938 | 3.953 | 0.919 | 3.915 | 0.909 |
| ASN-MET     | 3.945 | 0.699 | 4.065 | 0.649 | 3.983 | 0.620 |
| LEU-LYS-SER | 3.952 | 0.947 | 3.990 | 0.934 | 3.954 | 0.925 |
| ASP-ILE-LEU | 3.953 | 0.937 | 3.992 | 0.916 | 3.917 | 0.906 |

|             |       |       |       |       |       |       |
|-------------|-------|-------|-------|-------|-------|-------|
| GLN-MET     | 3.955 | 0.698 | 3.975 | 0.648 | 3.902 | 0.620 |
| LEU-LYS-THR | 3.955 | 0.941 | 4.033 | 0.923 | 4.007 | 0.910 |
| ALA-GLN-LEU | 3.965 | 0.936 | 4.006 | 0.916 | 3.927 | 0.905 |
| GLU-ILE-VAL | 3.971 | 0.931 | 3.951 | 0.909 | 3.931 | 0.903 |
| ARG-GLY-LEU | 3.972 | 0.945 | 4.027 | 0.928 | 3.992 | 0.920 |
| GLY-LEU-THR | 3.975 | 0.947 | 4.056 | 0.928 | 4.040 | 0.917 |
| ARG-LEU-LYS | 3.981 | 0.940 | 4.008 | 0.925 | 3.954 | 0.916 |
| ALA-SER-VAL | 3.989 | 0.942 | 4.044 | 0.924 | 4.030 | 0.920 |
| ALA-THR-VAL | 3.992 | 0.939 | 4.075 | 0.916 | 4.052 | 0.909 |
| MET-PRO     | 3.994 | 0.690 | 3.986 | 0.638 | 3.989 | 0.614 |
| ALA-ARG-VAL | 4.001 | 0.935 | 4.049 | 0.914 | 4.036 | 0.909 |
| ASP-LEU-SER | 4.002 | 0.945 | 4.045 | 0.926 | 3.965 | 0.920 |
| ALA-ASP-VAL | 4.002 | 0.938 | 4.078 | 0.915 | 4.053 | 0.906 |
| LEU-TYR-VAL | 4.005 | 0.910 | 4.055 | 0.882 | 3.996 | 0.873 |
| CYS-GLN     | 4.012 | 0.691 | 4.052 | 0.664 | 4.032 | 0.659 |
| ALA-LEU-TYR | 4.012 | 0.916 | 4.043 | 0.891 | 3.979 | 0.878 |
| ASP-GLY-LEU | 4.018 | 0.946 | 4.108 | 0.925 | 4.039 | 0.914 |
| ALA-ASN-LEU | 4.018 | 0.936 | 4.067 | 0.916 | 4.024 | 0.903 |
| ARG-ASP-LEU | 4.019 | 0.939 | 4.046 | 0.919 | 3.971 | 0.912 |
| GLU-LEU-PHE | 4.021 | 0.926 | 4.021 | 0.900 | 3.989 | 0.894 |
| GLN-LEU-VAL | 4.023 | 0.928 | 4.062 | 0.905 | 4.008 | 0.897 |
| ALA-ARG-GLU | 4.023 | 0.941 | 4.037 | 0.924 | 4.009 | 0.915 |
| GLU-GLY-VAL | 4.024 | 0.943 | 4.092 | 0.922 | 4.108 | 0.913 |
| ALA-ILE-LYS | 4.024 | 0.933 | 4.090 | 0.915 | 4.073 | 0.903 |
| LEU-SER-THR | 4.030 | 0.946 | 4.079 | 0.929 | 4.024 | 0.922 |
| ARG-GLU-VAL | 4.035 | 0.933 | 4.017 | 0.912 | 3.980 | 0.907 |
| GLY-ILE-VAL | 4.039 | 0.932 | 4.103 | 0.911 | 4.132 | 0.904 |
| ILE-LYS-VAL | 4.046 | 0.926 | 4.125 | 0.905 | 4.134 | 0.898 |
| ALA-GLU-GLY | 4.052 | 0.949 | 4.107 | 0.930 | 4.106 | 0.918 |
| PRO-TRP     | 4.053 | 0.721 | 3.998 | 0.696 | 4.018 | 0.706 |
| MET-TYR     | 4.056 | 0.681 | 4.145 | 0.627 | 4.099 | 0.600 |
| GLU-ILE-LYS | 4.057 | 0.931 | 4.091 | 0.913 | 4.072 | 0.901 |
| ASP-LEU-THR | 4.060 | 0.940 | 4.126 | 0.917 | 4.053 | 0.907 |
| ILE-THR-VAL | 4.061 | 0.927 | 4.150 | 0.904 | 4.159 | 0.899 |
| ALA-GLY-ILE | 4.062 | 0.937 | 4.133 | 0.918 | 4.131 | 0.908 |
| GLU-GLY-LYS | 4.070 | 0.941 | 4.152 | 0.923 | 4.169 | 0.909 |
| ARG-LEU-SER | 4.074 | 0.945 | 4.085 | 0.931 | 4.010 | 0.925 |
| GLN-GLU-LEU | 4.075 | 0.936 | 4.066 | 0.916 | 3.988 | 0.905 |
| ARG-LEU-THR | 4.075 | 0.939 | 4.137 | 0.920 | 4.080 | 0.912 |
| ALA-GLU-SER | 4.081 | 0.947 | 4.103 | 0.930 | 4.074 | 0.923 |
| ASN-LEU-VAL | 4.084 | 0.930 | 4.140 | 0.908 | 4.091 | 0.896 |
| ALA-PHE-VAL | 4.085 | 0.916 | 4.114 | 0.887 | 4.118 | 0.883 |
| ASN-TRP     | 4.086 | 0.719 | 4.130 | 0.695 | 4.086 | 0.701 |
| ALA-GLY-LYS | 4.088 | 0.943 | 4.182 | 0.926 | 4.212 | 0.913 |
| ALA-GLU-THR | 4.093 | 0.943 | 4.153 | 0.922 | 4.110 | 0.911 |

|             |       |       |       |       |       |       |
|-------------|-------|-------|-------|-------|-------|-------|
| GLY-LYS-VAL | 4.098 | 0.937 | 4.186 | 0.917 | 4.239 | 0.907 |
| ALA-ARG-ILE | 4.099 | 0.929 | 4.140 | 0.911 | 4.123 | 0.904 |
| ILE-LEU-PHE | 4.099 | 0.915 | 4.126 | 0.890 | 4.070 | 0.885 |
| ARG-ILE-VAL | 4.100 | 0.922 | 4.129 | 0.900 | 4.128 | 0.897 |
| GLN-TRP     | 4.104 | 0.719 | 4.116 | 0.695 | 4.011 | 0.702 |
| GLU-THR-VAL | 4.104 | 0.937 | 4.129 | 0.915 | 4.098 | 0.906 |
| GLU-SER-VAL | 4.106 | 0.941 | 4.107 | 0.922 | 4.080 | 0.917 |
| ASP-ILE-VAL | 4.122 | 0.927 | 4.188 | 0.903 | 4.164 | 0.896 |
| TRP-TYR     | 4.122 | 0.713 | 4.167 | 0.687 | 4.095 | 0.692 |
| ILE-SER-VAL | 4.127 | 0.929 | 4.179 | 0.910 | 4.146 | 0.908 |
| GLY-THR-VAL | 4.128 | 0.938 | 4.223 | 0.916 | 4.256 | 0.907 |
| ALA-ILE-THR | 4.130 | 0.932 | 4.204 | 0.911 | 4.183 | 0.902 |
| ALA-ASP-ILE | 4.131 | 0.932 | 4.199 | 0.911 | 4.159 | 0.900 |
| ALA-GLY-SER | 4.132 | 0.947 | 4.200 | 0.932 | 4.176 | 0.925 |
| GLY-SER-VAL | 4.134 | 0.942 | 4.216 | 0.924 | 4.230 | 0.919 |
| ARG-GLU-ILE | 4.137 | 0.928 | 4.108 | 0.908 | 4.060 | 0.901 |
| ALA-ILE-SER | 4.137 | 0.935 | 4.173 | 0.918 | 4.123 | 0.912 |
| LEU-LYS-PHE | 4.139 | 0.919 | 4.159 | 0.894 | 4.150 | 0.886 |
| ASP-LYS-VAL | 4.141 | 0.932 | 4.202 | 0.909 | 4.192 | 0.900 |
| GLY-LEU-PHE | 4.142 | 0.925 | 4.179 | 0.900 | 4.169 | 0.894 |
| ASN-GLU-LEU | 4.144 | 0.936 | 4.147 | 0.916 | 4.096 | 0.903 |
| GLN-ILE-LEU | 4.147 | 0.923 | 4.181 | 0.902 | 4.109 | 0.892 |
| LEU-PRO-VAL | 4.153 | 0.920 | 4.184 | 0.895 | 4.153 | 0.889 |
| ALA-ASP-GLU | 4.156 | 0.945 | 4.183 | 0.924 | 4.149 | 0.913 |
| LEU-PHE-SER | 4.160 | 0.923 | 4.165 | 0.900 | 4.133 | 0.898 |
| ILE-LEU-TYR | 4.161 | 0.905 | 4.190 | 0.880 | 4.110 | 0.869 |
| ALA-LEU-PRO | 4.164 | 0.925 | 4.182 | 0.902 | 4.145 | 0.893 |
| GLU-LEU-TYR | 4.165 | 0.916 | 4.165 | 0.892 | 4.091 | 0.879 |
| ALA-ASP-LYS | 4.166 | 0.938 | 4.223 | 0.918 | 4.215 | 0.904 |
| ALA-GLY-THR | 4.174 | 0.943 | 4.285 | 0.923 | 4.291 | 0.912 |
| ASP-GLY-VAL | 4.175 | 0.937 | 4.280 | 0.914 | 4.287 | 0.905 |
| GLN-LEU-LYS | 4.176 | 0.928 | 4.222 | 0.908 | 4.155 | 0.896 |
| ASP-GLU-VAL | 4.178 | 0.938 | 4.176 | 0.914 | 4.147 | 0.907 |
| GLU-GLY-ILE | 4.189 | 0.935 | 4.231 | 0.916 | 4.211 | 0.905 |
| ARG-GLY-VAL | 4.189 | 0.933 | 4.255 | 0.913 | 4.280 | 0.907 |
| ALA-ASP-GLY | 4.201 | 0.943 | 4.308 | 0.922 | 4.283 | 0.910 |
| ALA-LYS-SER | 4.201 | 0.943 | 4.279 | 0.929 | 4.257 | 0.920 |
| LYS-THR-VAL | 4.204 | 0.932 | 4.306 | 0.910 | 4.312 | 0.900 |
| ASN-ILE-LEU | 4.204 | 0.924 | 4.253 | 0.902 | 4.201 | 0.891 |
| ILE-PHE-VAL | 4.204 | 0.905 | 4.253 | 0.876 | 4.255 | 0.874 |
| ALA-TYR-VAL | 4.209 | 0.905 | 4.252 | 0.877 | 4.238 | 0.867 |
| ARG-LEU-PHE | 4.209 | 0.917 | 4.214 | 0.892 | 4.173 | 0.889 |
| GLU-ILE-THR | 4.217 | 0.932 | 4.254 | 0.911 | 4.230 | 0.901 |
| GLU-ILE-SER | 4.218 | 0.934 | 4.228 | 0.916 | 4.195 | 0.910 |
| LEU-PHE-THR | 4.218 | 0.921 | 4.262 | 0.895 | 4.234 | 0.888 |



|             |       |       |       |       |       |       |
|-------------|-------|-------|-------|-------|-------|-------|
| GLU-PHE-VAL | 4.221 | 0.915 | 4.211 | 0.886 | 4.208 | 0.882 |
| ALA-ARG-GLY | 4.223 | 0.941 | 4.295 | 0.923 | 4.308 | 0.915 |
| GLU-LYS-SER | 4.225 | 0.941 | 4.251 | 0.926 | 4.235 | 0.916 |
| ALA-GLU-PHE | 4.235 | 0.920 | 4.244 | 0.894 | 4.221 | 0.886 |
| GLU-LYS-THR | 4.238 | 0.936 | 4.299 | 0.916 | 4.283 | 0.903 |
| ARG-GLU-LYS | 4.239 | 0.935 | 4.236 | 0.917 | 4.196 | 0.907 |
| ALA-LYS-THR | 4.239 | 0.938 | 4.341 | 0.918 | 4.329 | 0.906 |
| LEU-LYS-TYR | 4.240 | 0.909 | 4.289 | 0.885 | 4.231 | 0.871 |
| ARG-GLU-GLY | 4.241 | 0.938 | 4.263 | 0.920 | 4.261 | 0.910 |
| GLU-GLY-SER | 4.242 | 0.945 | 4.284 | 0.928 | 4.274 | 0.920 |
| ASN-LEU-LYS | 4.242 | 0.931 | 4.307 | 0.911 | 4.273 | 0.895 |
| LYS-SER-VAL | 4.243 | 0.935 | 4.300 | 0.918 | 4.284 | 0.911 |
| ASP-SER-VAL | 4.250 | 0.934 | 4.306 | 0.913 | 4.269 | 0.908 |
| GLY-ILE-LYS | 4.250 | 0.929 | 4.322 | 0.911 | 4.350 | 0.899 |
| ARG-ASP-VAL | 4.251 | 0.927 | 4.314 | 0.904 | 4.264 | 0.899 |
| GLY-LEU-TYR | 4.253 | 0.915 | 4.320 | 0.890 | 4.265 | 0.877 |
| ALA-GLN-VAL | 4.253 | 0.924 | 4.307 | 0.900 | 4.266 | 0.893 |
| GLU-GLY-THR | 4.261 | 0.942 | 4.329 | 0.921 | 4.338 | 0.909 |
| GLN-LEU-SER | 4.262 | 0.931 | 4.289 | 0.912 | 4.211 | 0.905 |
| ASP-LEU-PHE | 4.262 | 0.919 | 4.257 | 0.891 | 4.189 | 0.886 |
| ASN-GLY-LEU | 4.262 | 0.933 | 4.341 | 0.912 | 4.313 | 0.898 |
| ASP-GLU-LYS | 4.263 | 0.938 | 4.267 | 0.918 | 4.242 | 0.906 |
| SER-THR-VAL | 4.264 | 0.936 | 4.328 | 0.915 | 4.298 | 0.911 |
| ALA-ILE-PHE | 4.265 | 0.910 | 4.293 | 0.884 | 4.251 | 0.878 |
| GLY-ILE-THR | 4.267 | 0.931 | 4.359 | 0.910 | 4.376 | 0.901 |
| ALA-ASP-SER | 4.267 | 0.941 | 4.317 | 0.922 | 4.267 | 0.914 |
| GLY-PHE-VAL | 4.267 | 0.916 | 4.332 | 0.888 | 4.368 | 0.883 |
| ALA-SER-THR | 4.272 | 0.941 | 4.343 | 0.923 | 4.306 | 0.917 |
| GLU-LEU-PRO | 4.274 | 0.924 | 4.250 | 0.900 | 4.203 | 0.892 |
| ARG-LYS-VAL | 4.276 | 0.928 | 4.331 | 0.908 | 4.313 | 0.901 |
| GLY-ILE-SER | 4.277 | 0.933 | 4.335 | 0.916 | 4.332 | 0.910 |
| ALA-ARG-LYS | 4.279 | 0.936 | 4.315 | 0.920 | 4.295 | 0.910 |
| LEU-SER-TYR | 4.280 | 0.913 | 4.317 | 0.889 | 4.242 | 0.879 |
| ASP-THR-VAL | 4.280 | 0.931 | 4.375 | 0.906 | 4.346 | 0.899 |
| GLN-GLY-LEU | 4.281 | 0.932 | 4.364 | 0.911 | 4.291 | 0.899 |
| ALA-ARG-ASP | 4.286 | 0.935 | 4.353 | 0.914 | 4.300 | 0.906 |
| ARG-GLN-LEU | 4.286 | 0.925 | 4.307 | 0.905 | 4.214 | 0.897 |
| ASP-GLU-ILE | 4.292 | 0.932 | 4.283 | 0.910 | 4.247 | 0.900 |
| ASN-LEU-SER | 4.295 | 0.933 | 4.353 | 0.915 | 4.287 | 0.905 |
| ALA-ASP-THR | 4.296 | 0.937 | 4.394 | 0.913 | 4.350 | 0.903 |
| ASP-GLY-LYS | 4.298 | 0.935 | 4.398 | 0.915 | 4.399 | 0.902 |
| ARG-LEU-TYR | 4.299 | 0.907 | 4.310 | 0.883 | 4.227 | 0.872 |
| ALA-ASN-VAL | 4.299 | 0.926 | 4.360 | 0.902 | 4.359 | 0.890 |
| GLN-LEU-THR | 4.307 | 0.926 | 4.373 | 0.903 | 4.305 | 0.893 |
| ARG-GLY-ILE | 4.310 | 0.927 | 4.355 | 0.907 | 4.367 | 0.901 |

|             |       |       |       |       |       |       |
|-------------|-------|-------|-------|-------|-------|-------|
| ARG-ASN-LEU | 4.315 | 0.926 | 4.344 | 0.906 | 4.280 | 0.895 |
| ILE-TYR-VAL | 4.323 | 0.895 | 4.371 | 0.866 | 4.347 | 0.860 |
| ALA-GLY-PHE | 4.323 | 0.921 | 4.363 | 0.895 | 4.382 | 0.887 |
| ASP-ILE-LYS | 4.324 | 0.926 | 4.364 | 0.905 | 4.342 | 0.893 |
| ARG-THR-VAL | 4.326 | 0.928 | 4.397 | 0.905 | 4.363 | 0.900 |
| ASP-GLY-ILE | 4.327 | 0.930 | 4.404 | 0.908 | 4.371 | 0.898 |
| GLY-LEU-PRO | 4.333 | 0.926 | 4.369 | 0.903 | 4.345 | 0.895 |
| LEU-PRO-SER | 4.334 | 0.922 | 4.348 | 0.901 | 4.294 | 0.896 |
| ARG-SER-VAL | 4.335 | 0.932 | 4.354 | 0.914 | 4.320 | 0.910 |
| ASN-ASP-LEU | 4.337 | 0.929 | 4.406 | 0.906 | 4.324 | 0.894 |
| CYS-LEU-VAL | 4.338 | 0.696 | 4.368 | 0.669 | 4.360 | 0.663 |
| ALA-CYS-LEU | 4.338 | 0.700 | 4.373 | 0.674 | 4.392 | 0.666 |
| ALA-PRO-VAL | 4.338 | 0.917 | 4.388 | 0.892 | 4.390 | 0.886 |
| ALA-ARG-THR | 4.339 | 0.935 | 4.422 | 0.915 | 4.391 | 0.908 |
| GLY-LYS-SER | 4.342 | 0.940 | 4.422 | 0.925 | 4.419 | 0.916 |
| ASN-LEU-THR | 4.345 | 0.928 | 4.428 | 0.905 | 4.364 | 0.892 |
| GLY-LYS-THR | 4.348 | 0.936 | 4.452 | 0.916 | 4.489 | 0.904 |
| ASP-GLN-LEU | 4.349 | 0.927 | 4.383 | 0.903 | 4.278 | 0.893 |
| ALA-ARG-SER | 4.349 | 0.940 | 4.351 | 0.925 | 4.303 | 0.919 |
| ASP-GLY-SER | 4.349 | 0.938 | 4.425 | 0.919 | 4.389 | 0.912 |
| LEU-THR-TYR | 4.349 | 0.910 | 4.409 | 0.884 | 4.337 | 0.871 |
| LYS-PHE-VAL | 4.349 | 0.909 | 4.424 | 0.881 | 4.444 | 0.875 |
| PHE-THR-VAL | 4.351 | 0.912 | 4.418 | 0.882 | 4.430 | 0.878 |
| ALA-PHE-SER | 4.353 | 0.918 | 4.372 | 0.894 | 4.354 | 0.891 |
| ALA-GLN-GLU | 4.353 | 0.931 | 4.369 | 0.909 | 4.289 | 0.899 |
| GLY-SER-THR | 4.356 | 0.940 | 4.438 | 0.922 | 4.444 | 0.915 |
| ILE-LYS-THR | 4.357 | 0.926 | 4.442 | 0.905 | 4.438 | 0.895 |
| ARG-ASP-ILE | 4.358 | 0.922 | 4.391 | 0.900 | 4.350 | 0.894 |
| ASP-LEU-TYR | 4.362 | 0.910 | 4.397 | 0.883 | 4.297 | 0.871 |
| ALA-GLN-ILE | 4.362 | 0.919 | 4.409 | 0.897 | 4.361 | 0.886 |
| LEU-LYS-PRO | 4.366 | 0.917 | 4.375 | 0.894 | 4.362 | 0.885 |
| ILE-LYS-SER | 4.368 | 0.929 | 4.411 | 0.913 | 4.408 | 0.905 |
| ASP-GLU-GLY | 4.371 | 0.942 | 4.405 | 0.920 | 4.378 | 0.910 |
| HIS-LEU-VAL | 4.372 | 0.854 | 4.393 | 0.827 | 4.371 | 0.827 |
| PHE-SER-VAL | 4.372 | 0.913 | 4.406 | 0.887 | 4.405 | 0.886 |
| ILE-SER-THR | 4.375 | 0.929 | 4.438 | 0.910 | 4.418 | 0.905 |
| GLU-LYS-PHE | 4.377 | 0.914 | 4.383 | 0.887 | 4.391 | 0.879 |
| ALA-ILE-TYR | 4.377 | 0.901 | 4.412 | 0.875 | 4.365 | 0.864 |
| GLU-SER-THR | 4.377 | 0.940 | 4.415 | 0.921 | 4.388 | 0.914 |
| ALA-LYS-PHE | 4.378 | 0.914 | 4.423 | 0.888 | 4.420 | 0.879 |
| ARG-GLU-THR | 4.381 | 0.933 | 4.397 | 0.913 | 4.353 | 0.905 |
| ARG-GLU-SER | 4.383 | 0.938 | 4.354 | 0.922 | 4.295 | 0.915 |
| ASP-GLY-THR | 4.383 | 0.935 | 4.492 | 0.911 | 4.487 | 0.902 |
| ALA-HIS-LEU | 4.387 | 0.858 | 4.377 | 0.833 | 4.340 | 0.831 |

|             |       |       |       |       |       |       |
|-------------|-------|-------|-------|-------|-------|-------|
| ILE-LEU-PRO | 4.388 | 0.912 | 4.391 | 0.888 | 4.338 | 0.881 |
| ASP-ILE-THR | 4.391 | 0.926 | 4.471 | 0.902 | 4.433 | 0.893 |
| ARG-ILE-LYS | 4.395 | 0.922 | 4.421 | 0.904 | 4.396 | 0.896 |
| GLY-TYR-VAL | 4.399 | 0.906 | 4.472 | 0.878 | 4.498 | 0.868 |
| ALA-ASN-ILE | 4.400 | 0.919 | 4.476 | 0.897 | 4.451 | 0.885 |
| GLU-ILE-PHE | 4.403 | 0.909 | 4.417 | 0.882 | 4.386 | 0.877 |
| ASP-ILE-SER | 4.404 | 0.928 | 4.447 | 0.908 | 4.393 | 0.901 |
| ARG-ASP-GLU | 4.404 | 0.934 | 4.370 | 0.913 | 4.321 | 0.906 |
| LEU-PRO-THR | 4.409 | 0.921 | 4.455 | 0.896 | 4.417 | 0.887 |
| ASP-GLU-SER | 4.412 | 0.940 | 4.406 | 0.920 | 4.366 | 0.914 |
| GLN-ILE-VAL | 4.412 | 0.912 | 4.461 | 0.888 | 4.429 | 0.881 |
| GLU-TYR-VAL | 4.414 | 0.905 | 4.403 | 0.877 | 4.373 | 0.868 |
| ALA-ASN-GLU | 4.414 | 0.932 | 4.442 | 0.910 | 4.420 | 0.897 |
| GLN-GLU-VAL | 4.419 | 0.924 | 4.397 | 0.900 | 4.351 | 0.892 |
| ASP-LEU-PRO | 4.420 | 0.917 | 4.428 | 0.890 | 4.366 | 0.884 |
| ASP-PHE-VAL | 4.422 | 0.911 | 4.472 | 0.880 | 4.453 | 0.876 |
| ALA-GLU-TYR | 4.430 | 0.911 | 4.443 | 0.885 | 4.410 | 0.872 |
| ARG-PHE-VAL | 4.431 | 0.906 | 4.451 | 0.878 | 4.447 | 0.877 |
| GLU-GLY-PHE | 4.435 | 0.920 | 4.469 | 0.893 | 4.484 | 0.885 |
| ALA-PHE-THR | 4.436 | 0.917 | 4.481 | 0.889 | 4.460 | 0.882 |
| ARG-GLY-LYS | 4.440 | 0.933 | 4.495 | 0.916 | 4.498 | 0.907 |
| ASN-GLU-VAL | 4.440 | 0.926 | 4.468 | 0.902 | 4.440 | 0.892 |
| ARG-ILE-SER | 4.441 | 0.926 | 4.448 | 0.909 | 4.404 | 0.904 |
| ARG-GLU-PHE | 4.444 | 0.911 | 4.446 | 0.885 | 4.424 | 0.881 |
| ALA-ASP-PHE | 4.457 | 0.915 | 4.473 | 0.886 | 4.451 | 0.879 |
| GLN-LEU-PHE | 4.459 | 0.904 | 4.485 | 0.875 | 4.441 | 0.868 |
| ASP-GLU-THR | 4.462 | 0.937 | 4.482 | 0.913 | 4.434 | 0.904 |
| ARG-GLY-SER | 4.463 | 0.938 | 4.495 | 0.922 | 4.450 | 0.917 |
| GLU-PHE-SER | 4.467 | 0.917 | 4.470 | 0.892 | 4.456 | 0.889 |
| ASP-LYS-SER | 4.472 | 0.935 | 4.497 | 0.917 | 4.485 | 0.908 |
| LEU-PHE-TYR | 4.474 | 0.891 | 4.463 | 0.860 | 4.405 | 0.851 |
| ALA-ARG-PHE | 4.476 | 0.912 | 4.471 | 0.887 | 4.447 | 0.882 |
| GLN-GLU-ILE | 4.490 | 0.919 | 4.494 | 0.896 | 4.445 | 0.886 |
| ARG-LEU-PRO | 4.491 | 0.917 | 4.492 | 0.895 | 4.454 | 0.889 |
| GLU-PRO-VAL | 4.493 | 0.916 | 4.464 | 0.889 | 4.448 | 0.884 |

**Figure 10.1:** Overlap between the significant FreSCOs found for the 1E-80, 1E-40 and 1E-7 protein sets.

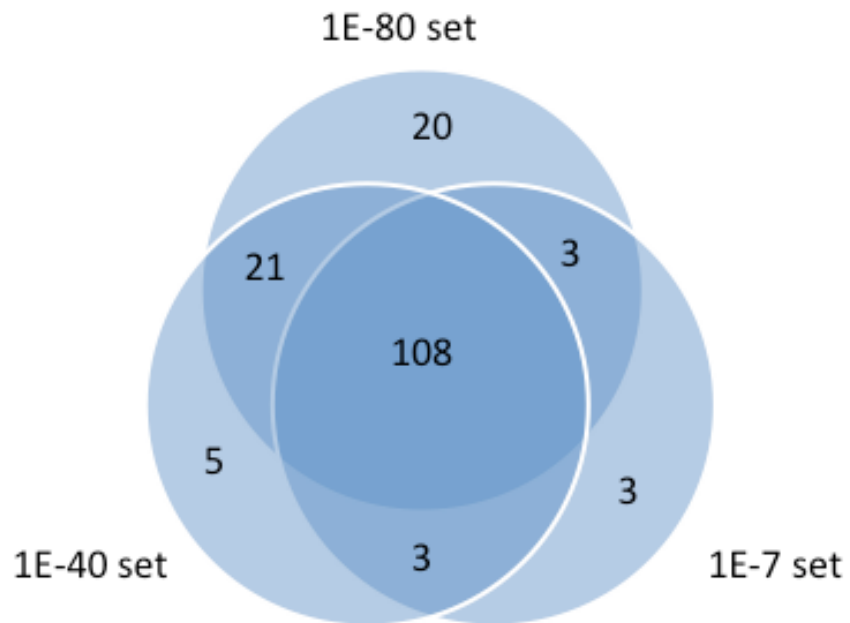

Supplement: 13040_2015_38_MOESM1_ESM.pdf [file 13040_2015_38_MOESM1_ESM.pdf]
