# Supplementary material for: Mining the entire Protein DataBank for frequent spatially cohesive amino acid patterns
Source: Springer Nature journal article supplement (doi:10.1186/s13040-015-0038-4), 2015-01-30

**Additional file 1:** Smoothed kernel density of the cohesion radius of the FreSCO GLY-ILE-ARG from the permuted protein structures. One sample Kolmogorov-Smirnov test does not reject the null hypothesis that this data is derived from a normal distribution with a mean of 4.29 and a standard deviation of 0.0064 with a P-value of 0.9997.

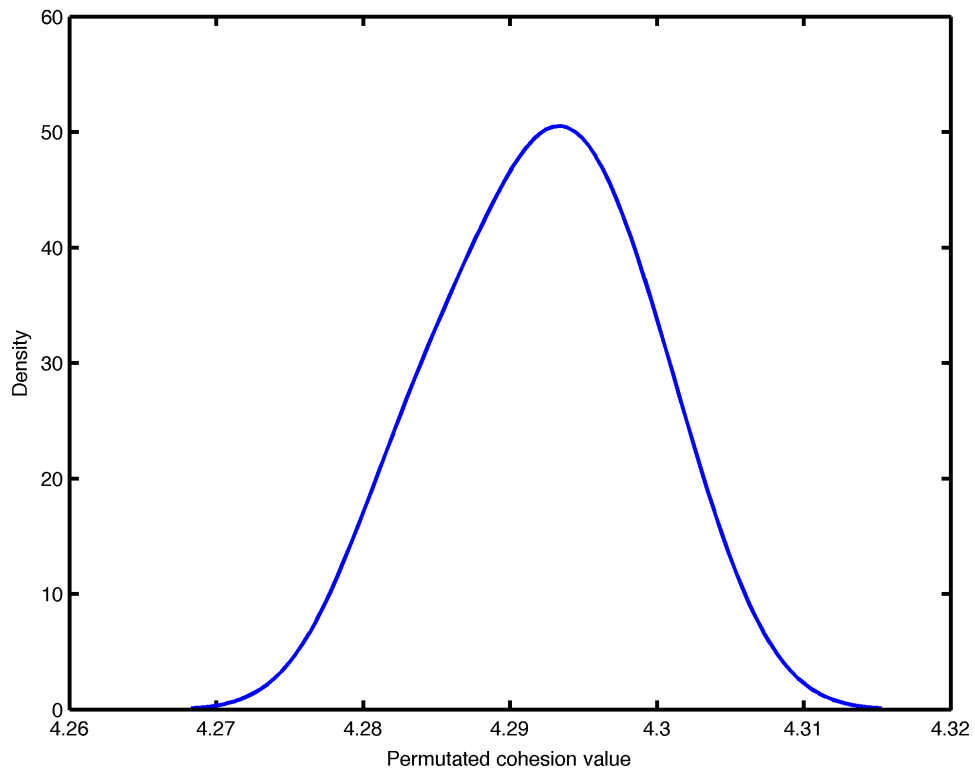

Supplement: 13040_2015_38_MOESM2_ESM.pdf [file 13040_2015_38_MOESM2_ESM.pdf]
