# Supplementary material for: Mining the entire Protein DataBank for frequent spatially cohesive amino acid patterns
Source: Springer Nature journal article supplement (doi:10.1186/s13040-015-0038-4), 2015-01-30
Supplement: 13040_2015_38_MOESM3_ESM.pdf [file 13040_2015_38_MOESM3_ESM.pdf]

**Additional file 2:** Frequency and cohesion radius of the significant doublet and triplet FreSCOs in the non-redundant protein data set. P-value based on the cohesion radius of the same patterns in permuted protein structures.

| FreSCO      | Frequency | Cohesion radius | P-value   |
|-------------|-----------|-----------------|-----------|
| PHE VAL ILE | 0.90504   | 4.2507          | <<1E-400  |
| VAL TYR ILE | 0.894866  | 4.3225          | <<1E-400  |
| ALA VAL ILE | 0.932545  | 3.8108          | <<1E-400  |
| LEU ILE ARG | 0.93407   | 3.8944          | 5.55E-315 |
| PHE LEU ILE | 0.914841  | 4.1614          | 2.12E-296 |
| ALA PHE LEU | 0.926478  | 3.9357          | 1.72E-280 |
| TYR LEU ILE | 0.90504   | 4.2218          | 3.89E-279 |
| ALA LEU ILE | 0.94496   | 3.6562          | 4.04E-239 |
| ALA TYR ILE | 0.900933  | 4.3768          | 2.71E-235 |
| CYS VAL LEU | 0.696329  | 4.4647          | 1.78E-227 |
| THR LEU ILE | 0.93715   | 3.9034          | 4.09E-223 |
| VAL TYR LEU | 0.909552  | 4.0297          | 8.85E-211 |
| ALA TYR LEU | 0.916086  | 4.0234          | 1.79E-208 |
| ALA PHE VAL | 0.915837  | 4.0853          | 2.16E-205 |
| THR TYR LEU | 0.91033   | 4.3649          | 3.32E-158 |
| TYR TRP     | 0.712508  | 4.1223          | 1.51E-155 |
| ALA PHE ILE | 0.910361  | 4.2654          | 1.51E-154 |
| PHE VAL LEU | 0.920504  | 3.9803          | 8.17E-150 |
| VAL LEU ARG | 0.939235  | 3.8038          | 1.26E-144 |
| GLU PHE LEU | 0.925576  | 3.9872          | 7.49E-143 |
| CYS ALA LEU | 0.69972   | 4.4681          | 1.79E-139 |
| LYS LEU ILE | 0.937243  | 3.8368          | 1.36E-134 |
| TYR CYS     | 0.687492  | 3.8926          | 2.94E-129 |
| GLU LEU ILE | 0.944151  | 3.7246          | 1.81E-121 |
| VAL LEU ILE | 0.937554  | 3.6816          | 7.30E-121 |
| ILE CYS     | 0.694773  | 3.2757          | 3.23E-120 |
| THR VAL ILE | 0.927225  | 4.0483          | 5.52E-118 |
| ALA VAL LEU | 0.950404  | 3.5333          | 1.58E-117 |
| PHE TYR     | 0.895395  | 3.1836          | 1.74E-116 |
| ALA LEU ARG | 0.94832   | 3.7968          | 2.69E-115 |
| LYS TYR LEU | 0.909303  | 4.2419          | 2.44E-113 |
| TYR LEU ARG | 0.907374  | 4.3991          | 1.71E-110 |
| PHE VAL ARG | 0.906129  | 4.4951          | 3.88E-104 |
| PHE CYS     | 0.691101  | 3.5931          | 6.46E-100 |
| ILE TYR     | 0.909956  | 2.8629          | 2.06E-97  |
| VAL ILE ARG | 0.92178   | 4.1             | 2.69E-95  |
| HIS CYS     | 0.654636  | 4.4508          | 5.39E-95  |
| ALA VAL TYR | 0.905352  | 4.2085          | 2.98E-94  |
| GLU ALA LEU | 0.95753   | 3.5522          | 7.32E-92  |
| ASN VAL ILE | 0.914063  | 4.4034          | 1.54E-91  |

|             |          |        |          |
|-------------|----------|--------|----------|
| ILE PHE     | 0.919104 | 2.7912 | 7.56E-88 |
| ALA THR ILE | 0.932172 | 4.1303 | 1.53E-87 |
| PHE LEU ARG | 0.916801 | 4.2971 | 6.48E-86 |
| ALA ILE ARG | 0.929309 | 4.0988 | 1.78E-83 |
| LYS VAL LEU | 0.942937 | 3.6753 | 3.81E-83 |
| VAL CYS     | 0.701711 | 2.9799 | 1.89E-80 |
| PHE TRP     | 0.718575 | 3.918  | 2.44E-80 |
| ASN LEU ILE | 0.923802 | 4.2024 | 6.29E-79 |
| ALA CYS     | 0.7056   | 3.0052 | 2.00E-77 |
| LEU GLN ILE | 0.923211 | 4.1465 | 4.84E-77 |
| LEU CYS     | 0.707996 | 2.7738 | 1.58E-76 |
| ASP VAL ILE | 0.926727 | 4.0825 | 3.53E-73 |
| ALA LYS ILE | 0.932576 | 4.0242 | 3.18E-72 |
| ALA LYS LEU | 0.951213 | 3.6599 | 6.35E-71 |
| GLU PHE ILE | 0.90949  | 4.4034 | 1.41E-65 |
| GLU ILE ARG | 0.927878 | 4.1368 | 1.00E-62 |
| ARG TYR     | 0.913441 | 2.9867 | 1.24E-62 |
| THR ILE ARG | 0.922246 | 4.4326 | 1.18E-59 |
| LYS VAL ILE | 0.925762 | 4.0136 | 3.88E-58 |
| GLU LEU ARG | 0.946702 | 3.7695 | 1.37E-57 |
| PHE THR VAL | 0.911761 | 4.4123 | 3.80E-57 |
| LEU TRP     | 0.734319 | 2.9795 | 2.69E-55 |
| PHE THR LEU | 0.921157 | 4.3154 | 5.54E-53 |
| THR VAL LEU | 0.942937 | 3.7865 | 1.21E-52 |
| GLU LYS LEU | 0.95028  | 3.6629 | 7.26E-52 |
| GLU PHE VAL | 0.91509  | 4.1815 | 1.73E-49 |
| ASP ILE ARG | 0.922309 | 4.358  | 2.41E-48 |
| ASN ALA ILE | 0.919353 | 4.4045 | 9.05E-48 |
| GLU VAL LEU | 0.949253 | 3.5921 | 1.13E-47 |
| THR CYS     | 0.704574 | 3.3882 | 1.59E-46 |
| ALA LEU GLN | 0.935594 | 3.9914 | 8.91E-46 |
| GLN TRP     | 0.718544 | 4.1039 | 1.77E-45 |
| VAL TRP     | 0.728531 | 3.2336 | 4.76E-45 |
| VAL PHE     | 0.924798 | 2.5831 | 4.37E-44 |
| ILE TRP     | 0.724362 | 3.5272 | 4.81E-44 |
| ASP LEU ILE | 0.936777 | 3.9315 | 2.00E-42 |
| ALA THR LEU | 0.949035 | 3.8111 | 2.58E-41 |
| GLU PHE ARG | 0.911325 | 4.4443 | 2.12E-40 |
| GLU VAL ILE | 0.930989 | 3.934  | 4.90E-38 |
| VAL GLN ILE | 0.91229  | 4.4123 | 1.77E-36 |
| ALA GLN ILE | 0.918606 | 4.3621 | 9.42E-36 |
| GLU LYS ILE | 0.931301 | 4.0574 | 1.64E-35 |
| VAL LEU GLN | 0.928158 | 4.053  | 1.83E-35 |
| PHE LYS VAL | 0.90921  | 4.4124 | 6.17E-33 |
| PHE HIS     | 0.840386 | 3.6749 | 1.15E-31 |

|             |          |        |          |
|-------------|----------|--------|----------|
| ALA LEU HIS | 0.85809  | 4.4068 | 1.59E-30 |
| ALA VAL ARG | 0.934536 | 4.001  | 2.94E-30 |
| ASP VAL LEU | 0.942097 | 3.7847 | 1.24E-29 |
| ILE THR     | 0.942844 | 2.574  | 1.27E-29 |
| ASN ALA LEU | 0.936341 | 4.0355 | 1.56E-29 |
| LEU PHE     | 0.936279 | 2.4709 | 7.31E-29 |
| TYR HIS     | 0.832327 | 3.8447 | 1.78E-28 |
| ASP TYR LEU | 0.910143 | 4.36   | 4.71E-28 |
| GLU TYR LEU | 0.916273 | 4.1405 | 6.35E-28 |
| LYS VAL TYR | 0.899347 | 4.4709 | 1.13E-26 |
| VAL LEU HIS | 0.854045 | 4.4209 | 3.19E-26 |
| ASN VAL LEU | 0.930274 | 4.0623 | 4.11E-26 |
| ILE ARG     | 0.939546 | 2.5732 | 8.00E-24 |
| LEU GLN ARG | 0.925109 | 4.2862 | 8.18E-24 |
| GLU ALA PHE | 0.920473 | 4.2072 | 5.19E-23 |
| GLU ALA ILE | 0.938177 | 3.908  | 3.21E-22 |
| THR PHE     | 0.926042 | 2.862  | 5.20E-22 |
| GLU ALA VAL | 0.943746 | 3.7623 | 8.08E-22 |
| GLU LYS VAL | 0.937337 | 3.8919 | 3.71E-20 |
| ALA PHE ARG | 0.912352 | 4.4759 | 1.14E-19 |
| LEU TYR     | 0.926011 | 2.5307 | 1.28E-19 |
| ALA PHE THR | 0.917082 | 4.4363 | 1.44E-19 |
| GLU PHE LYS | 0.913752 | 4.3765 | 1.67E-19 |
| GLU ALA LYS | 0.944742 | 3.8518 | 3.38E-19 |
| ARG TRP     | 0.726416 | 3.6344 | 1.03E-18 |
| PHE LYS LEU | 0.918762 | 4.2395 | 1.87E-18 |
| GLY VAL TYR | 0.906067 | 4.3988 | 3.34E-18 |
| ILE MET     | 0.704107 | 3.3326 | 7.07E-18 |
| GLU VAL ARG | 0.933261 | 4.0128 | 5.50E-17 |
| GLU ALA ARG | 0.941381 | 4.0144 | 2.71E-16 |
| VAL TYR     | 0.914312 | 2.6893 | 8.51E-15 |
| ALA PHE SER | 0.918046 | 4.3527 | 2.37E-14 |
| VAL ILE     | 0.942533 | 2.4042 | 2.89E-13 |
| ALA THR VAL | 0.938519 | 3.9917 | 9.45E-13 |
| PHE LEU SER | 0.922744 | 4.2451 | 1.13E-12 |
| PHE MET     | 0.691973 | 3.8125 | 3.17E-12 |
| LEU GLN     | 0.946329 | 2.4662 | 3.59E-12 |
| TYR LEU SER | 0.912539 | 4.3759 | 3.78E-12 |
| PHE GLN     | 0.908152 | 3.164  | 4.05E-12 |
| ALA PHE LYS | 0.91397  | 4.3778 | 4.25E-12 |
| ILE GLN     | 0.928127 | 2.8328 | 1.20E-11 |
| ARG PHE     | 0.92178  | 2.8829 | 1.69E-11 |
| LEU HIS     | 0.866615 | 2.742  | 3.65E-10 |
| LYS LEU GLN | 0.928065 | 4.191  | 5.30E-10 |
| ALA VAL GLN | 0.924144 | 4.2532 | 6.16E-10 |

|             |          |        |             |
|-------------|----------|--------|-------------|
| ILE HIS     | 0.849938 | 3.22   | 8.67E-10    |
| LEU SER ILE | 0.940292 | 3.9085 | 1.60E-09    |
| LYS TRP     | 0.725762 | 3.531  | 3.39E-09    |
| ALA LYS VAL | 0.938488 | 3.8878 | 9.09E-09    |
| GLY TYR LEU | 0.915121 | 4.245  | 4.29E-08    |
| THR TYR     | 0.915619 | 3.0041 | 6.87E-08    |
| PHE VAL SER | 0.913037 | 4.4338 | 1.30E-07    |
| ALA ASP ILE | 0.932234 | 4.1305 | 1.84E-07    |
| ASP LEU ARG | 0.938519 | 4.0262 | 2.46E-07    |
| GLU LEU GLN | 0.935874 | 4.0806 | 5.74E-07    |
| ALA TYR     | 0.921717 | 2.757  | 2.15E-06    |
| TYR MET     | 0.681269 | 4.0557 | 4.24E-06    |
| THR LEU GLN | 0.926198 | 4.3498 | 6.40E-06    |
| ASN PHE     | 0.912321 | 3.1703 | 8.27E-06    |
| ALA PHE     | 0.931269 | 2.6472 | 9.19E-06    |
| ASN TRP     | 0.719073 | 4.0865 | 1.21E-05    |
| GLU VAL TYR | 0.905227 | 4.3791 | 1.21E-05    |
| GLN TYR     | 0.900809 | 3.348  | 4.28E-05    |
| PHE ASP VAL | 0.910797 | 4.4892 | 6.65E-05    |
| LEU ALA     | 0.971935 | 2.206  | 0.000106349 |
| LEU ARG     | 0.960019 | 2.3368 | 0.000140656 |
| ARG CYS     | 0.700778 | 3.5344 | 0.000166226 |
