# Supplementary material for: Mining the entire Protein DataBank for frequent spatially cohesive amino acid patterns
Source: Springer Nature journal article supplement (doi:10.1186/s13040-015-0038-4), 2015-01-30
Supplement: 13040_2015_38_MOESM4_ESM.pdf [file 13040_2015_38_MOESM4_ESM.pdf]

**Additional file 3:** Domain enrichment and depletion P-values for each mined FreSCO. Significance calculated based on a hypergeometric distribution with a P-value cut-off of 4.808E-5.

| FreSCO      | Enrichment P-value | Depletion P-value |
|-------------|--------------------|-------------------|
| CYS VAL LEU | 1.456E-71          | 1.000             |
| CYS ALA LEU | 3.349E-70          | 1.000             |
| VAL TYR ILE | 4.026E-60          | 1.000             |
| ALA TYR ILE | 3.260E-48          | 1.000             |
| ALA PHE ILE | 5.425E-46          | 1.000             |
| ALA VAL ILE | 1.497E-44          | 1.000             |
| GLY VAL TYR | 1.433E-43          | 1.000             |
| TYR LEU ILE | 1.552E-43          | 1.000             |
| PHE VAL ILE | 1.858E-43          | 1.000             |
| VAL TYR LEU | 1.199E-42          | 1.000             |
| GLY TYR LEU | 4.348E-39          | 1.000             |
| VAL LEU ILE | 2.151E-38          | 1.000             |
| PHE LEU ILE | 3.558E-36          | 1.000             |
| ALA PHE VAL | 2.230E-33          | 1.000             |
| ALA VAL TYR | 1.848E-30          | 1.000             |
| ALA LEU ILE | 2.290E-29          | 1.000             |
| ALA THR ILE | 2.679E-29          | 1.000             |
| ALA PHE THR | 1.352E-28          | 1.000             |
| ASP VAL ILE | 1.736E-28          | 1.000             |
| ALA PHE LEU | 1.175E-27          | 1.000             |
| THR VAL ILE | 6.450E-27          | 1.000             |
| ALA TYR LEU | 8.671E-26          | 1.000             |
| PHE THR VAL | 3.854E-22          | 1.000             |
| PHE VAL LEU | 8.093E-22          | 1.000             |
| ASN VAL ILE | 1.250E-21          | 1.000             |
| ALA VAL LEU | 4.737E-21          | 1.000             |
| PHE THR LEU | 1.334E-20          | 1.000             |
| ASP VAL LEU | 2.326E-20          | 1.000             |
| PHE ASP VAL | 2.947E-20          | 1.000             |
| ASN ALA ILE | 1.792E-19          | 1.000             |
| ALA ILE ARG | 9.967E-19          | 1.000             |
| ALA THR VAL | 6.566E-18          | 1.000             |
| VAL ILE ARG | 9.530E-18          | 1.000             |
| VAL LEU HIS | 3.345E-17          | 1.000             |
| ALA PHE ARG | 1.432E-16          | 1.000             |
| ASP TYR LEU | 3.529E-16          | 1.000             |
| PHE VAL ARG | 8.777E-16          | 1.000             |
| PHE VAL SER | 3.273E-15          | 1.000             |
| THR TYR LEU | 5.312E-14          | 1.000             |

|             |           |       |
|-------------|-----------|-------|
| ASP LEU ILE | 7.401E-14 | 1.000 |
| ALA ASP ILE | 2.397E-11 | 1.000 |
| ASN VAL LEU | 4.205E-11 | 1.000 |
| ALA LEU HIS | 1.690E-10 | 1.000 |
| ALA VAL ARG | 2.237E-10 | 1.000 |
| THR LEU ILE | 9.919E-10 | 1.000 |
| VAL GLN ILE | 1.321E-09 | 1.000 |
| GLU VAL TYR | 8.304E-09 | 1.000 |
| ASN LEU ILE | 1.834E-08 | 1.000 |
| GLU ALA VAL | 2.862E-08 | 1.000 |
| ALA THR LEU | 3.717E-07 | 1.000 |
| ASN ALA LEU | 6.766E-07 | 1.000 |
| GLU ALA PHE | 1.220E-06 | 1.000 |
| PHE LEU ARG | 1.708E-06 | 1.000 |
| TYR LEU ARG | 3.595E-06 | 1.000 |
| ALA LYS VAL | 7.051E-06 | 1.000 |
| TYR LEU SER | 7.425E-06 | 1.000 |
| LEU SER ILE | 9.867E-06 | 1.000 |
| ALA PHE LYS | 1.331E-05 | 1.000 |
| ALA PHE SER | 2.425E-05 | 1.000 |
| ALA GLN ILE | 2.567E-05 | 1.000 |
| VAL LEU ARG | 2.643E-05 | 1.000 |
| PHE LEU SER | 6.728E-05 | 1.000 |
| ASP ILE ARG | 7.025E-05 | 1.000 |
| PHE LYS LEU | 1.237E-04 | 1.000 |
| GLU ALA ILE | 2.299E-04 | 1.000 |
| ALA VAL GLN | 3.150E-04 | 1.000 |
| THR ILE ARG | 3.421E-04 | 1.000 |
| LYS VAL ILE | 3.631E-04 | 1.000 |
| GLU PHE VAL | 8.073E-04 | 0.999 |
| GLU PHE ILE | 8.544E-04 | 0.999 |
| LEU ILE ARG | 8.658E-04 | 0.999 |
| PHE LYS VAL | 2.338E-03 | 0.998 |
| GLU VAL ILE | 4.108E-03 | 0.996 |
| ALA LYS ILE | 4.935E-03 | 0.995 |
| GLU TYR LEU | 5.488E-03 | 0.995 |
| LEU GLN ILE | 6.211E-03 | 0.994 |
| ALA LEU ARG | 7.759E-03 | 0.992 |
| THR VAL LEU | 8.367E-03 | 0.992 |
| GLU VAL ARG | 0.012     | 0.988 |
| GLU VAL LEU | 0.019     | 0.982 |
| LYS VAL TYR | 0.028     | 0.973 |
| VAL LEU GLN | 0.045     | 0.956 |
| GLU PHE ARG | 0.049     | 0.952 |
| ALA LEU GLN | 0.067     | 0.934 |

|             |       |           |
|-------------|-------|-----------|
| GLU PHE LEU | 0.098 | 0.904     |
| LYS VAL LEU | 0.189 | 0.814     |
| ASP LEU ARG | 0.329 | 0.675     |
| GLU ALA LYS | 0.437 | 0.567     |
| LYS LEU ILE | 0.475 | 0.529     |
| ALA LYS LEU | 0.580 | 0.424     |
| GLU LYS VAL | 0.624 | 0.380     |
| GLU ALA ARG | 0.675 | 0.328     |
| GLU ALA LEU | 0.734 | 0.269     |
| GLU ILE ARG | 0.922 | 0.079     |
| LEU GLN ARG | 0.939 | 0.062     |
| LYS TYR LEU | 0.956 | 0.045     |
| GLU PHE LYS | 1.000 | 1.971E-04 |
| THR LEU GLN | 1.000 | 3.154E-05 |
| GLU LEU ARG | 1.000 | 3.059E-05 |
| GLU LEU ILE | 1.000 | 1.111E-05 |
| LYS LEU GLN | 1.000 | 5.172E-06 |
| GLU LEU GLN | 1.000 | 4.895E-11 |
| GLU LYS ILE | 1.000 | 2.052E-12 |
| GLU LYS LEU | 1.000 | 3.210E-16 |
