# Supplementary material for: Mining the entire Protein DataBank for frequent spatially cohesive amino acid patterns
Source: Springer Nature journal article supplement (doi:10.1186/s13040-015-0038-4), 2015-01-30
Supplement: 13040_2015_38_MOESM5_ESM.pdf [file 13040_2015_38_MOESM5_ESM.pdf]

**Additional file 4:** Domain enrichment and depletion P-values of individual amino acids. Significance calculated based on a hypergeometric distribution with a P-value cut-off of 2.27E-4.

| Amino acid | Fraction in conserved domains | Enrichment P-value | Depletion P-value |
|------------|-------------------------------|--------------------|-------------------|
| ASX        | 1                             | 0.596              | 1.000             |
| CYS        | 0.836                         | <<1E-200           | 1.000             |
| VAL        | 0.79                          | 2.67E-191          | 1.000             |
| ILE        | 0.789                         | 9.23E-134          | 1.000             |
| TYR        | 0.786                         | 8.03E-56           | 1.000             |
| TRP        | 0.786                         | 1.39E-21           | 1.000             |
| GLY        | 0.786                         | 7.20E-112          | 1.000             |
| ASN        | 0.781                         | 3.42E-30           | 1.000             |
| PHE        | 0.781                         | 5.76E-27           | 1.000             |
| ALA        | 0.78                          | 6.13E-47           | 1.000             |
| THR        | 0.779                         | 6.14E-23           | 1.000             |
| ASP        | 0.777                         | 4.94E-15           | 1.000             |
| LEU        | 0.771                         | 0.896              | 0.104             |
| GLN        | 0.767                         | 1.000              | 3.60E-07          |
| LYS        | 0.768                         | 1.000              | 1.73E-08          |
| HIS        | 0.766                         | 1.000              | 6.45E-08          |
| MET        | 0.765                         | 1.000              | 7.81E-08          |
| ARG        | 0.765                         | 1.000              | 1.85E-18          |
| GLU        | 0.762                         | 1.000              | 1.84E-51          |
| SER        | 0.744                         | 1.000              | <<1E-200          |
| PRO        | 0.737                         | 1.000              | <<1E-200          |
| XAA        | 0.474                         | 1.000              | <<1E-200          |
