# Supplementary material for: Mining the entire Protein DataBank for frequent spatially cohesive amino acid patterns
Source: Springer Nature journal article supplement (doi:10.1186/s13040-015-0038-4), 2015-01-30
Supplement: 13040_2015_38_MOESM6_ESM.pdf [file 13040_2015_38_MOESM6_ESM.pdf]

**Additional file 8:** Gene ontology enrichment for the 104 significant FreSCOs. Only FreSCOs enriched with a P-value lower than a significance cut-off adjusted for multiple testing of 1.25E-7 (0.01/104 FreSCOs and 770 GO terms) are reported.

| Ontology           | Gene Ontology term | FreSCO      | P-value  |
|--------------------|--------------------|-------------|----------|
| molecular function | nucleotide binding | VAL LEU GLN | 1.82E-09 |
| molecular function | nucleotide binding | LYS VAL LEU | 2.90E-13 |
| molecular function | nucleotide binding | ALA LEU ARG | 5.22E-15 |
| molecular function | nucleotide binding | LYS LEU ILE | 5.52E-13 |
| molecular function | nucleotide binding | ALA VAL ILE | 4.13E-12 |
| molecular function | nucleotide binding | PHE VAL SER | 9.00E-10 |
| molecular function | nucleotide binding | ASP VAL LEU | 1.73E-16 |
| molecular function | nucleotide binding | GLU LEU GLN | 1.22E-10 |
| molecular function | nucleotide binding | ALA PHE ILE | 4.30E-11 |
| molecular function | nucleotide binding | ALA PHE LEU | 6.07E-08 |
| molecular function | nucleotide binding | GLU ALA ILE | 1.67E-21 |
| molecular function | nucleotide binding | ASN LEU ILE | 2.16E-13 |
| molecular function | nucleotide binding | GLU ALA LYS | 1.53E-11 |
| molecular function | nucleotide binding | TYR LEU ARG | 1.07E-08 |
| molecular function | nucleotide binding | LEU ILE ARG | 3.36E-10 |
| molecular function | nucleotide binding | ASP VAL ILE | 1.42E-08 |
| molecular function | nucleotide binding | ALA ILE ARG | 1.10E-12 |
| molecular function | nucleotide binding | ALA PHE THR | 2.52E-08 |
| molecular function | nucleotide binding | LYS LEU GLN | 3.46E-10 |
| molecular function | nucleotide binding | THR VAL ILE | 6.75E-14 |
| molecular function | nucleotide binding | LYS VAL ILE | 6.45E-15 |
| molecular function | nucleotide binding | PHE VAL ILE | 1.56E-15 |
| molecular function | nucleotide binding | VAL LEU ILE | 2.62E-25 |
| molecular function | nucleotide binding | ASP LEU ARG | 3.19E-16 |
| molecular function | nucleotide binding | ASP LEU ILE | 3.03E-09 |
| molecular function | nucleotide binding | ASN VAL LEU | 4.37E-11 |
| molecular function | nucleotide binding | VAL LEU ARG | 9.02E-12 |
| molecular function | nucleotide binding | GLU ALA LEU | 2.53E-18 |
| molecular function | nucleotide binding | ASP ILE ARG | 8.23E-13 |
| molecular function | nucleotide binding | VAL GLN ILE | 1.21E-09 |
| molecular function | nucleotide binding | ALA LYS ILE | 1.59E-17 |
| molecular function | nucleotide binding | ALA TYR LEU | 1.71E-10 |
| molecular function | nucleotide binding | ALA GLN ILE | 7.50E-13 |
| molecular function | nucleotide binding | GLU VAL ARG | 2.85E-17 |
| molecular function | nucleotide binding | GLY VAL TYR | 1.96E-08 |
| molecular function | nucleotide binding | GLU LYS VAL | 2.59E-13 |
| molecular function | nucleotide binding | GLU PHE LYS | 1.98E-11 |
| molecular function | nucleotide binding | ALA LYS LEU | 2.63E-19 |
| molecular function | nucleotide binding | GLU ALA VAL | 9.25E-15 |

|                    |                    |             |          |
|--------------------|--------------------|-------------|----------|
| molecular function | nucleotide binding | GLU PHE ARG | 8.68E-09 |
| molecular function | nucleotide binding | ASN ALA LEU | 2.90E-11 |
| molecular function | nucleotide binding | THR ILE ARG | 3.77E-13 |
| molecular function | nucleotide binding | PHE VAL LEU | 4.50E-09 |
| molecular function | nucleotide binding | ALA THR LEU | 7.73E-10 |
| molecular function | nucleotide binding | THR VAL LEU | 1.96E-09 |
| molecular function | nucleotide binding | GLU VAL ILE | 4.54E-17 |
| molecular function | nucleotide binding | GLU LEU ARG | 1.00E-21 |
| molecular function | nucleotide binding | ALA THR VAL | 3.35E-15 |
| molecular function | nucleotide binding | LEU GLN ILE | 1.04E-09 |
| molecular function | nucleotide binding | GLU LYS ILE | 8.68E-14 |
| molecular function | nucleotide binding | LEU SER ILE | 2.44E-11 |
| molecular function | nucleotide binding | PHE LEU ILE | 1.24E-08 |
| molecular function | nucleotide binding | GLY TYR LEU | 3.03E-10 |
| molecular function | nucleotide binding | ASN ALA ILE | 1.67E-12 |
| molecular function | nucleotide binding | PHE ASP VAL | 1.78E-08 |
| molecular function | nucleotide binding | GLU PHE LEU | 1.91E-09 |
| molecular function | nucleotide binding | ALA TYR ILE | 3.20E-09 |
| molecular function | nucleotide binding | GLU LYS LEU | 7.14E-20 |
| molecular function | nucleotide binding | GLU ILE ARG | 1.80E-19 |
| molecular function | nucleotide binding | ALA VAL LEU | 6.26E-13 |
| molecular function | nucleotide binding | THR LEU GLN | 2.30E-11 |
| molecular function | nucleotide binding | ALA THR ILE | 2.48E-14 |
| molecular function | nucleotide binding | ALA PHE VAL | 5.11E-08 |
| molecular function | nucleotide binding | ALA LYS VAL | 1.73E-09 |
| molecular function | nucleotide binding | ALA LEU GLN | 2.02E-12 |
| molecular function | nucleotide binding | ASN VAL ILE | 4.05E-09 |
| molecular function | nucleotide binding | ALA VAL ARG | 6.15E-13 |
| molecular function | nucleotide binding | GLU ALA ARG | 1.77E-22 |
| molecular function | nucleotide binding | GLU PHE ILE | 3.22E-08 |
| molecular function | nucleotide binding | VAL ILE ARG | 4.42E-11 |
| molecular function | nucleotide binding | GLU VAL LEU | 3.80E-20 |
| molecular function | nucleotide binding | ALA LEU ILE | 9.47E-13 |
| molecular function | nucleotide binding | GLU ALA PHE | 5.28E-11 |
| molecular function | nucleotide binding | ALA VAL GLN | 3.83E-08 |
| molecular function | nucleotide binding | ALA ASP ILE | 1.99E-09 |
| molecular function | nucleotide binding | LEU GLN ARG | 2.59E-09 |
| molecular function | nucleotide binding | GLU LEU ILE | 5.09E-20 |
| molecular function | lyase activity     | ALA VAL ARG | 1.04E-07 |
| molecular function | lyase activity     | GLU ALA ILE | 3.13E-10 |
| molecular function | lyase activity     | GLU ALA ARG | 4.28E-12 |
| molecular function | lyase activity     | ALA LEU ARG | 2.48E-08 |
| molecular function | lyase activity     | ASN ALA LEU | 1.70E-08 |
| molecular function | lyase activity     | ALA LEU ILE | 8.16E-11 |
| molecular function | lyase activity     | ALA THR LEU | 6.61E-09 |

|                    |                       |             |          |
|--------------------|-----------------------|-------------|----------|
| molecular function | lyase activity        | ALA VAL ILE | 4.23E-08 |
| molecular function | lyase activity        | ALA PHE LEU | 1.07E-08 |
| molecular function | magnesium ion binding | ALA ASP ILE | 6.88E-08 |
| molecular function | magnesium ion binding | GLU VAL LEU | 5.46E-08 |
| molecular function | DNA binding           | LEU ILE ARG | 8.83E-08 |
| molecular function | transferase activity  | LYS VAL LEU | 2.54E-09 |
| molecular function | transferase activity  | ALA LEU ARG | 5.98E-21 |
| molecular function | transferase activity  | LYS LEU ILE | 5.38E-09 |
| molecular function | transferase activity  | ALA VAL ILE | 5.42E-13 |
| molecular function | transferase activity  | ASP VAL LEU | 1.34E-15 |
| molecular function | transferase activity  | GLU LEU GLN | 7.12E-11 |
| molecular function | transferase activity  | ALA PHE ILE | 1.33E-10 |
| molecular function | transferase activity  | ALA PHE ARG | 2.18E-14 |
| molecular function | transferase activity  | ALA PHE LEU | 3.22E-10 |
| molecular function | transferase activity  | GLU ALA ILE | 1.19E-25 |
| molecular function | transferase activity  | ASN LEU ILE | 3.93E-13 |
| molecular function | transferase activity  | ASP TYR LEU | 3.39E-10 |
| molecular function | transferase activity  | GLU ALA LYS | 1.43E-09 |
| molecular function | transferase activity  | TYR LEU ARG | 8.29E-09 |
| molecular function | transferase activity  | GLU VAL TYR | 4.02E-08 |
| molecular function | transferase activity  | LEU ILE ARG | 1.52E-17 |
| molecular function | transferase activity  | ASP VAL ILE | 4.57E-11 |
| molecular function | transferase activity  | ALA ILE ARG | 9.77E-19 |
| molecular function | transferase activity  | LYS VAL ILE | 3.70E-08 |
| molecular function | transferase activity  | VAL LEU ILE | 3.67E-15 |
| molecular function | transferase activity  | ASP LEU ARG | 1.35E-20 |
| molecular function | transferase activity  | ASP LEU ILE | 8.42E-12 |
| molecular function | transferase activity  | VAL LEU ARG | 7.72E-10 |
| molecular function | transferase activity  | GLU ALA LEU | 1.92E-21 |
| molecular function | transferase activity  | ASP ILE ARG | 6.87E-13 |
| molecular function | transferase activity  | ALA VAL TYR | 1.13E-08 |
| molecular function | transferase activity  | ALA TYR LEU | 3.21E-11 |
| molecular function | transferase activity  | GLU VAL ARG | 3.45E-18 |
| molecular function | transferase activity  | GLU LYS VAL | 6.31E-12 |
| molecular function | transferase activity  | GLU PHE LYS | 2.07E-08 |
| molecular function | transferase activity  | ALA LYS LEU | 3.72E-11 |
| molecular function | transferase activity  | GLU ALA VAL | 5.81E-16 |
| molecular function | transferase activity  | GLU PHE ARG | 5.24E-15 |
| molecular function | transferase activity  | ASN ALA LEU | 6.53E-10 |
| molecular function | transferase activity  | ALA THR LEU | 2.88E-09 |
| molecular function | transferase activity  | GLU VAL ILE | 5.03E-16 |
| molecular function | transferase activity  | GLU LEU ARG | 1.03E-21 |
| molecular function | transferase activity  | ALA LEU HIS | 1.01E-08 |
| molecular function | transferase activity  | LEU GLN ILE | 1.20E-09 |
| molecular function | transferase activity  | GLU LYS ILE | 2.58E-12 |

|                    |                          |             |          |
|--------------------|--------------------------|-------------|----------|
| molecular function | transferase activity     | LEU SER ILE | 8.85E-14 |
| molecular function | transferase activity     | GLY TYR LEU | 6.79E-10 |
| molecular function | transferase activity     | GLU PHE LEU | 2.16E-13 |
| molecular function | transferase activity     | GLU LYS LEU | 2.25E-21 |
| molecular function | transferase activity     | GLU TYR LEU | 2.81E-21 |
| molecular function | transferase activity     | ALA TYR ILE | 4.11E-09 |
| molecular function | transferase activity     | GLU ILE ARG | 2.25E-15 |
| molecular function | transferase activity     | ALA VAL LEU | 8.62E-20 |
| molecular function | transferase activity     | TYR LEU SER | 1.77E-11 |
| molecular function | transferase activity     | ALA THR ILE | 2.67E-16 |
| molecular function | transferase activity     | ALA PHE VAL | 1.05E-09 |
| molecular function | transferase activity     | ALA LYS VAL | 7.18E-09 |
| molecular function | transferase activity     | ALA LEU GLN | 7.34E-11 |
| molecular function | transferase activity     | TYR LEU ILE | 7.88E-12 |
| molecular function | transferase activity     | PHE VAL ARG | 4.01E-10 |
| molecular function | transferase activity     | ALA VAL ARG | 1.44E-18 |
| molecular function | transferase activity     | GLU ALA ARG | 1.84E-22 |
| molecular function | transferase activity     | GLU VAL LEU | 1.51E-24 |
| molecular function | transferase activity     | ALA LEU ILE | 9.52E-13 |
| molecular function | transferase activity     | VAL ILE ARG | 3.03E-15 |
| molecular function | transferase activity     | GLU ALA PHE | 3.14E-18 |
| molecular function | transferase activity     | ALA ASP ILE | 6.15E-14 |
| molecular function | transferase activity     | LEU GLN ARG | 4.31E-11 |
| molecular function | transferase activity     | GLU LEU ILE | 1.45E-30 |
| molecular function | phosphoprotein binding   | PHE VAL SER | 1.52E-09 |
| molecular function | insulin receptor binding | CYS VAL LEU | 9.22E-11 |
| molecular function | oxygen binding           | ALA LEU HIS | 2.48E-08 |
| molecular function | oxygen binding           | PHE LYS LEU | 1.99E-09 |
| molecular function | catalytic activity       | ALA LYS LEU | 1.48E-11 |
| molecular function | catalytic activity       | CYS ALA LEU | 4.97E-11 |
| molecular function | catalytic activity       | ALA LEU ARG | 1.29E-18 |
| molecular function | catalytic activity       | ASN ALA LEU | 9.49E-12 |
| molecular function | catalytic activity       | ALA THR LEU | 2.29E-11 |
| molecular function | catalytic activity       | GLU LEU ARG | 1.96E-19 |
| molecular function | catalytic activity       | VAL LEU ARG | 9.66E-10 |
| molecular function | catalytic activity       | ALA VAL ARG | 4.98E-29 |
| molecular function | catalytic activity       | GLU ALA ARG | 1.50E-16 |
| molecular function | catalytic activity       | GLU ALA LYS | 8.84E-18 |
| molecular function | catalytic activity       | GLU ALA LEU | 1.80E-25 |
| molecular function | catalytic activity       | ALA LEU ILE | 1.46E-08 |
| molecular function | catalytic activity       | ASN ALA ILE | 5.19E-08 |
| molecular function | catalytic activity       | ALA LYS ILE | 1.12E-08 |
| molecular function | catalytic activity       | ALA ASP ILE | 1.92E-11 |
| molecular function | catalytic activity       | ALA ILE ARG | 1.91E-17 |
| molecular function | catalytic activity       | GLU VAL ARG | 2.35E-09 |

|                    |             |             |          |
|--------------------|-------------|-------------|----------|
| molecular function | ATP binding | ALA LYS LEU | 2.63E-12 |
| molecular function | ATP binding | GLU PHE LYS | 1.93E-08 |
| molecular function | ATP binding | GLU PHE ARG | 2.76E-08 |
| molecular function | ATP binding | GLU ALA VAL | 1.68E-09 |
| molecular function | ATP binding | LYS VAL LEU | 1.12E-08 |
| molecular function | ATP binding | ALA LEU ARG | 1.55E-13 |
| molecular function | ATP binding | THR ILE ARG | 2.61E-12 |
| molecular function | ATP binding | LYS LEU ILE | 2.96E-10 |
| molecular function | ATP binding | GLU VAL ILE | 5.52E-16 |
| molecular function | ATP binding | PHE VAL SER | 5.30E-08 |
| molecular function | ATP binding | ASP VAL LEU | 5.70E-08 |
| molecular function | ATP binding | GLU LEU GLN | 1.25E-10 |
| molecular function | ATP binding | GLU LEU ARG | 1.26E-15 |
| molecular function | ATP binding | GLU ALA ILE | 2.12E-17 |
| molecular function | ATP binding | LEU GLN ILE | 2.06E-16 |
| molecular function | ATP binding | GLU LYS ILE | 6.92E-12 |
| molecular function | ATP binding | ASN LEU ILE | 6.33E-10 |
| molecular function | ATP binding | LEU SER ILE | 2.00E-13 |
| molecular function | ATP binding | TYR LEU ARG | 7.41E-08 |
| molecular function | ATP binding | LEU ILE ARG | 7.63E-09 |
| molecular function | ATP binding | PHE ASP VAL | 2.42E-08 |
| molecular function | ATP binding | ASN ALA ILE | 7.07E-08 |
| molecular function | ATP binding | ASP VAL ILE | 6.63E-08 |
| molecular function | ATP binding | GLU LYS LEU | 7.36E-12 |
| molecular function | ATP binding | ALA ILE ARG | 2.37E-12 |
| molecular function | ATP binding | GLU ILE ARG | 7.17E-24 |
| molecular function | ATP binding | ALA VAL LEU | 6.52E-08 |
| molecular function | ATP binding | THR LEU GLN | 1.28E-10 |
| molecular function | ATP binding | ALA THR ILE | 1.40E-09 |
| molecular function | ATP binding | LYS VAL ILE | 2.65E-15 |
| molecular function | ATP binding | PHE VAL ILE | 6.80E-11 |
| molecular function | ATP binding | VAL LEU ILE | 1.62E-14 |
| molecular function | ATP binding | ASP LEU ARG | 3.45E-12 |
| molecular function | ATP binding | ASP LEU ILE | 4.09E-10 |
| molecular function | ATP binding | ALA LEU GLN | 4.72E-11 |
| molecular function | ATP binding | ASN VAL LEU | 1.11E-09 |
| molecular function | ATP binding | VAL LEU ARG | 4.16E-09 |
| molecular function | ATP binding | ALA VAL ARG | 1.11E-08 |
| molecular function | ATP binding | PHE VAL ARG | 7.96E-08 |
| molecular function | ATP binding | GLU ALA ARG | 2.71E-19 |
| molecular function | ATP binding | GLU ALA LEU | 3.05E-11 |
| molecular function | ATP binding | ASP ILE ARG | 2.25E-12 |
| molecular function | ATP binding | VAL ILE ARG | 3.02E-12 |
| molecular function | ATP binding | VAL GLN ILE | 2.28E-09 |
| molecular function | ATP binding | GLU VAL LEU | 1.21E-18 |

|                    |                                             |             |          |
|--------------------|---------------------------------------------|-------------|----------|
| molecular function | ATP binding                                 | ALA LYS ILE | 2.46E-08 |
| molecular function | ATP binding                                 | LEU GLN ARG | 1.30E-08 |
| molecular function | ATP binding                                 | ALA GLN ILE | 3.92E-10 |
| molecular function | ATP binding                                 | GLU VAL ARG | 4.16E-16 |
| molecular function | ATP binding                                 | GLU LEU ILE | 1.86E-19 |
| molecular function | ATP binding                                 | GLU LYS VAL | 1.47E-08 |
| molecular function | insulin-like growth factor receptor binding | ALA TYR LEU | 7.35E-08 |
| molecular function | insulin-like growth factor receptor binding | CYS VAL LEU | 1.87E-11 |
| molecular function | nucleoside diphosphate kinase activity      | ASP ILE ARG | 1.27E-09 |
| molecular function | nucleoside diphosphate kinase activity      | THR ILE ARG | 5.90E-09 |
| molecular function | ephrin receptor binding                     | PHE LEU SER | 3.66E-08 |
| molecular function | oxidoreductase activity                     | ALA LYS LEU | 1.05E-10 |
| molecular function | oxidoreductase activity                     | GLU ALA VAL | 2.93E-12 |
| molecular function | oxidoreductase activity                     | ALA LEU ARG | 4.71E-11 |
| molecular function | oxidoreductase activity                     | ALA VAL ILE | 1.76E-12 |
| molecular function | oxidoreductase activity                     | THR VAL LEU | 2.70E-16 |
| molecular function | oxidoreductase activity                     | ALA THR LEU | 2.57E-13 |
| molecular function | oxidoreductase activity                     | PHE VAL SER | 6.01E-08 |
| molecular function | oxidoreductase activity                     | ASP VAL LEU | 6.80E-08 |
| molecular function | oxidoreductase activity                     | GLU LEU ARG | 1.48E-08 |
| molecular function | oxidoreductase activity                     | ALA PHE ILE | 3.12E-08 |
| molecular function | oxidoreductase activity                     | ALA LEU HIS | 2.66E-10 |
| molecular function | oxidoreductase activity                     | ALA PHE LEU | 1.81E-13 |
| molecular function | oxidoreductase activity                     | ALA PHE SER | 5.75E-12 |
| molecular function | oxidoreductase activity                     | GLU ALA ILE | 2.26E-14 |
| molecular function | oxidoreductase activity                     | ALA THR VAL | 7.26E-14 |
| molecular function | oxidoreductase activity                     | GLY TYR LEU | 1.69E-10 |
| molecular function | oxidoreductase activity                     | ALA VAL LEU | 1.85E-13 |
| molecular function | oxidoreductase activity                     | ALA PHE THR | 6.33E-15 |
| molecular function | oxidoreductase activity                     | ALA PHE LYS | 8.65E-13 |
| molecular function | oxidoreductase activity                     | ALA THR ILE | 4.28E-09 |
| molecular function | oxidoreductase activity                     | THR VAL ILE | 1.09E-07 |
| molecular function | oxidoreductase activity                     | VAL LEU HIS | 9.96E-09 |
| molecular function | oxidoreductase activity                     | VAL LEU ILE | 5.31E-13 |
| molecular function | oxidoreductase activity                     | ASP LEU ARG | 1.63E-08 |
| molecular function | oxidoreductase activity                     | ALA LEU GLN | 7.16E-08 |
| molecular function | oxidoreductase activity                     | ALA VAL ARG | 5.13E-11 |
| molecular function | oxidoreductase activity                     | GLU ALA ARG | 3.59E-09 |
| molecular function | oxidoreductase activity                     | GLU ALA LEU | 3.39E-16 |
| molecular function | oxidoreductase activity                     | ALA VAL TYR | 7.56E-13 |
| molecular function | oxidoreductase activity                     | ALA LEU ILE | 2.14E-15 |

|                    |                                              |             |          |
|--------------------|----------------------------------------------|-------------|----------|
| molecular function | oxidoreductase activity                      | ALA TYR LEU | 3.82E-08 |
| molecular function | oxidoreductase activity                      | GLU ALA PHE | 2.66E-19 |
| molecular function | oxidoreductase activity                      | ALA ASP ILE | 1.39E-08 |
| molecular function | oxidoreductase activity                      | GLY VAL TYR | 8.35E-08 |
| molecular function | lysozyme activity                            | ASN ALA ILE | 1.09E-08 |
| molecular function | lysozyme activity                            | ALA VAL ARG | 2.26E-13 |
| molecular function | lysozyme activity                            | ALA ILE ARG | 4.57E-12 |
| molecular function | lysozyme activity                            | GLU LEU ARG | 7.55E-10 |
| molecular function | lysozyme activity                            | CYS ALA LEU | 1.39E-29 |
| molecular function | lysozyme activity                            | GLU ALA LYS | 7.00E-12 |
| molecular function | transaminase activity                        | ALA LYS LEU | 1.08E-08 |
| molecular function | transaminase activity                        | GLU ALA ILE | 3.52E-08 |
| molecular function | transaminase activity                        | GLU LYS LEU | 2.68E-08 |
| molecular function | oxygen transporter activity                  | ALA THR VAL | 9.89E-10 |
| molecular function | oxygen transporter activity                  | ALA LEU HIS | 6.31E-11 |
| molecular function | oxygen transporter activity                  | ALA PHE LYS | 2.61E-09 |
| molecular function | oxygen transporter activity                  | PHE LYS LEU | 4.24E-16 |
| molecular function | oxygen transporter activity                  | PHE LYS VAL | 1.69E-10 |
| molecular function | protease binding                             | CYS VAL LEU | 7.80E-10 |
| molecular function | hormone binding                              | GLU PHE ARG | 6.93E-09 |
| molecular function | hormone binding                              | ALA PHE VAL | 1.08E-07 |
| molecular function | hormone binding                              | ASN VAL ILE | 3.53E-10 |
| molecular function | hormone binding                              | PHE LYS VAL | 1.57E-10 |
| molecular function | ligase activity                              | ALA LEU ARG | 3.33E-08 |
| molecular function | ligase activity                              | TYR LEU ARG | 4.08E-08 |
| molecular function | hydrolase activity, acting on glycosyl bonds | ALA VAL ARG | 3.08E-11 |
| molecular function | hydrolase activity, acting on glycosyl bonds | ALA ILE ARG | 7.75E-10 |
| molecular function | hydrolase activity, acting on glycosyl bonds | CYS ALA LEU | 1.29E-09 |
| molecular function | hydrolase activity, acting on glycosyl bonds | GLU ALA LYS | 3.85E-09 |
| molecular function | methyltransferase activity                   | GLU ALA LEU | 4.58E-09 |
| molecular function | pancreatic ribonuclease activity             | PHE ASP VAL | 8.81E-10 |
| molecular function | pancreatic ribonuclease activity             | ASP VAL ILE | 5.14E-10 |
| molecular function | pancreatic ribonuclease activity             | PHE VAL ILE | 7.40E-09 |
| molecular function | pancreatic ribonuclease activity             | ALA PHE LYS | 3.61E-08 |
| molecular function | pancreatic ribonuclease activity             | VAL TYR ILE | 3.40E-13 |
| molecular function | kinase activity                              | GLU ALA ILE | 5.89E-09 |
| molecular function | kinase activity                              | GLU LEU ILE | 1.50E-09 |
| molecular function | kinase activity                              | GLU VAL LEU | 1.10E-08 |
| molecular function | metal ion binding                            | VAL LEU HIS | 9.25E-09 |
| molecular function | metal ion binding                            | ALA LEU HIS | 5.79E-09 |
| cellular component | mitochondrion                                | LYS TYR LEU | 3.35E-08 |

|                    |                                                                |             |          |
|--------------------|----------------------------------------------------------------|-------------|----------|
| cellular component | Golgi lumen                                                    | ALA TYR LEU | 7.35E-08 |
| cellular component | Golgi lumen                                                    | CYS VAL LEU | 4.05E-10 |
| cellular component | endosome lumen                                                 | ALA TYR LEU | 7.35E-08 |
| cellular component | endosome lumen                                                 | CYS VAL LEU | 4.05E-10 |
| cellular component | endoplasmic reticulum lumen                                    | CYS VAL LEU | 9.04E-08 |
| cellular component | protein complex                                                | GLU PHE ARG | 1.03E-07 |
| cellular component | protein complex                                                | ASN VAL ILE | 6.21E-08 |
| cellular component | hemoglobin complex                                             | CYS VAL LEU | 1.10E-09 |
| cellular component | hemoglobin complex                                             | ALA LEU HIS | 1.30E-10 |
| cellular component | cytoplasm                                                      | LYS LEU GLN | 2.71E-09 |
| cellular component | cytoplasm                                                      | GLU LYS LEU | 1.70E-08 |
| cellular component | secretory granule                                              | CYS VAL LEU | 9.16E-10 |
| cellular component | cytosol                                                        | PHE LEU SER | 1.07E-08 |
| cellular component | membrane                                                       | PHE VAL LEU | 4.01E-08 |
| cellular component | membrane                                                       | PHE THR VAL | 5.44E-09 |
| cellular component | membrane                                                       | PHE LEU SER | 6.70E-09 |
| cellular component | integral component of membrane                                 | PHE LEU ILE | 1.40E-14 |
| cellular component | integral component of membrane                                 | GLY TYR LEU | 1.67E-09 |
| cellular component | integral component of membrane                                 | THR VAL LEU | 3.49E-08 |
| cellular component | integral component of membrane                                 | PHE VAL LEU | 1.72E-14 |
| cellular component | integral component of membrane                                 | PHE THR VAL | 9.26E-13 |
| cellular component | integral component of membrane                                 | PHE VAL ILE | 3.72E-09 |
| cellular component | integral component of membrane                                 | VAL LEU ILE | 6.44E-08 |
| cellular component | integral component of membrane                                 | ALA PHE THR | 4.44E-14 |
| cellular component | integral component of membrane                                 | ALA PHE ILE | 4.27E-10 |
| cellular component | integral component of membrane                                 | TYR LEU SER | 1.65E-11 |
| cellular component | integral component of membrane                                 | PHE LEU SER | 4.24E-11 |
| cellular component | nucleosome                                                     | ALA TYR LEU | 3.03E-10 |
| biological process | positive regulation of phosphatidylinositol 3-kinase signaling | CYS VAL LEU | 1.49E-09 |
| biological process | oxidation-reduction process                                    | ALA LYS LEU | 1.18E-13 |
| biological process | oxidation-reduction process                                    | GLU ALA VAL | 3.06E-16 |
| biological process | oxidation-reduction process                                    | ALA LEU ARG | 4.31E-12 |



|                    |                                                           |             |          |
|--------------------|-----------------------------------------------------------|-------------|----------|
| biological process | oxidation-reduction process                               | ALA VAL ILE | 4.57E-15 |
| biological process | oxidation-reduction process                               | THR VAL LEU | 1.44E-16 |
| biological process | oxidation-reduction process                               | ALA THR LEU | 3.06E-19 |
| biological process | oxidation-reduction process                               | PHE VAL SER | 1.72E-08 |
| biological process | oxidation-reduction process                               | ASP VAL LEU | 8.91E-10 |
| biological process | oxidation-reduction process                               | GLU LEU ARG | 1.38E-08 |
| biological process | oxidation-reduction process                               | ALA LEU HIS | 1.24E-11 |
| biological process | oxidation-reduction process                               | PHE LEU SER | 9.30E-08 |
| biological process | oxidation-reduction process                               | ALA PHE ARG | 5.95E-09 |
| biological process | oxidation-reduction process                               | ALA PHE LEU | 5.66E-17 |
| biological process | oxidation-reduction process                               | ALA PHE SER | 4.47E-12 |
| biological process | oxidation-reduction process                               | GLU ALA ILE | 6.75E-15 |
| biological process | oxidation-reduction process                               | ALA THR VAL | 6.30E-18 |
| biological process | oxidation-reduction process                               | GLY TYR LEU | 5.40E-10 |
| biological process | oxidation-reduction process                               | ASN ALA ILE | 1.11E-07 |
| biological process | oxidation-reduction process                               | ALA ILE ARG | 9.60E-08 |
| biological process | oxidation-reduction process                               | ALA VAL LEU | 3.49E-15 |
| biological process | oxidation-reduction process                               | ALA PHE THR | 1.34E-21 |
| biological process | oxidation-reduction process                               | ALA PHE LYS | 2.30E-14 |
| biological process | oxidation-reduction process                               | ALA THR ILE | 1.09E-12 |
| biological process | oxidation-reduction process                               | ALA PHE VAL | 1.01E-09 |
| biological process | oxidation-reduction process                               | PHE LEU ARG | 4.01E-08 |
| biological process | oxidation-reduction process                               | VAL LEU HIS | 3.83E-09 |
| biological process | oxidation-reduction process                               | ALA LYS VAL | 8.92E-08 |
| biological process | oxidation-reduction process                               | VAL LEU ILE | 3.69E-13 |
| biological process | oxidation-reduction process                               | ASP LEU ARG | 4.29E-09 |
| biological process | oxidation-reduction process                               | ALA LEU GLN | 4.88E-09 |
| biological process | oxidation-reduction process                               | ALA VAL ARG | 9.42E-14 |
| biological process | oxidation-reduction process                               | GLU ALA ARG | 2.21E-10 |
| biological process | oxidation-reduction process                               | GLU ALA LEU | 4.51E-21 |
| biological process | oxidation-reduction process                               | ALA VAL TYR | 7.61E-13 |
| biological process | oxidation-reduction process                               | ALA LEU ILE | 1.29E-16 |
| biological process | oxidation-reduction process                               | ALA TYR LEU | 2.76E-09 |
| biological process | oxidation-reduction process                               | GLU ALA PHE | 2.55E-21 |
| biological process | oxidation-reduction process                               | ALA VAL GLN | 2.23E-10 |
| biological process | oxidation-reduction process                               | ALA ASP ILE | 2.24E-10 |
| biological process | negative regulation of gluconeogenesis                    | CYS VAL LEU | 3.30E-10 |
| biological process | positive regulation of protein autophosphorylation        | CYS VAL LEU | 4.05E-10 |
| biological process | inflammatory response                                     | CYS ALA LEU | 3.65E-10 |
| biological process | negative regulation of feeding behavior                   | CYS VAL LEU | 9.22E-11 |
| biological process | positive regulation of cellular protein metabolic process | CYS VAL LEU | 8.58E-11 |

|                    |                                                          |             |          |
|--------------------|----------------------------------------------------------|-------------|----------|
| biological process | positive regulation of mitosis                           | CYS VAL LEU | 9.22E-11 |
| biological process | negative regulation of acute inflammatory response       | CYS VAL LEU | 1.37E-08 |
| biological process | energy reserve metabolic process                         | CYS VAL LEU | 2.51E-10 |
| biological process | alpha-beta T cell activation                             | CYS VAL LEU | 9.22E-11 |
| biological process | fatty acid homeostasis                                   | CYS VAL LEU | 9.22E-11 |
| biological process | negative regulation of protein secretion                 | CYS VAL LEU | 9.22E-11 |
| biological process | positive regulation of cell growth                       | CYS VAL LEU | 1.27E-10 |
| biological process | glucose metabolic process                                | CYS VAL LEU | 1.12E-08 |
| biological process | positive regulation of glucose import                    | CYS VAL LEU | 1.87E-11 |
| biological process | positive regulation of vasodilation                      | ALA TYR LEU | 7.35E-08 |
| biological process | positive regulation of vasodilation                      | CYS VAL LEU | 1.87E-11 |
| biological process | glucose transport                                        | CYS VAL LEU | 5.66E-11 |
| biological process | regulation of protein secretion                          | CYS VAL LEU | 3.58E-08 |
| biological process | negative regulation of vasodilation                      | CYS VAL LEU | 9.22E-11 |
| biological process | defense response to bacterium                            | ALA VAL ARG | 5.44E-08 |
| biological process | defense response to bacterium                            | CYS ALA LEU | 1.45E-19 |
| biological process | positive regulation of DNA replication                   | CYS VAL LEU | 1.37E-08 |
| biological process | transport                                                | PHE LYS LEU | 1.51E-08 |
| biological process | negative regulation of NAD(P)H oxidase activity          | CYS VAL LEU | 9.22E-11 |
| biological process | protein heterooligomerization                            | PHE LEU SER | 2.86E-08 |
| biological process | negative regulation of fatty acid metabolic process      | CYS VAL LEU | 9.22E-11 |
| biological process | positive regulation of peptide hormone secretion         | CYS VAL LEU | 9.22E-11 |
| biological process | positive regulation of peptidyl-tyrosine phosphorylation | CYS VAL LEU | 3.54E-10 |
| biological process | small molecule metabolic process                         | CYS VAL LEU | 3.92E-08 |
| biological process | regulation of protein localization                       | CYS VAL LEU | 3.16E-08 |
| biological process | positive regulation of nitric-oxide synthase activity    | CYS VAL LEU | 1.87E-11 |
| biological process | activation of protein kinase B activity                  | CYS VAL LEU | 4.77E-09 |
| biological process | regulation of transmembrane transporter activity         | CYS VAL LEU | 9.22E-11 |
| biological process | protein acetylation                                      | ASN VAL ILE | 8.23E-08 |
| biological process | protein acetylation                                      | PHE LYS VAL | 4.49E-08 |
| biological process | protein acetylation                                      | THR ILE ARG | 8.87E-08 |
| biological process | cilium or flagellum-dependent                            | GLU PHE LYS | 6.24E-09 |

|                    |                                                          |             |          |
|--------------------|----------------------------------------------------------|-------------|----------|
|                    | cell motility                                            |             |          |
| biological process | cilium or flagellum-dependent cell motility              | LYS LEU GLN | 4.94E-08 |
| biological process | cilium or flagellum-dependent cell motility              | GLU PHE ILE | 3.52E-10 |
| biological process | cilium or flagellum-dependent cell motility              | ASN VAL ILE | 9.02E-11 |
| biological process | positive regulation of nitric oxide biosynthetic process | CYS VAL LEU | 3.74E-12 |
| biological process | positive regulation of lipid biosynthetic process        | CYS VAL LEU | 1.87E-11 |
| biological process | positive regulation of respiratory burst                 | CYS VAL LEU | 9.22E-11 |
| biological process | cell wall macromolecule catabolic process                | CYS ALA LEU | 1.74E-09 |
| biological process | negative regulation of protein oligomerization           | CYS VAL LEU | 9.22E-11 |
| biological process | insulin receptor signaling pathway                       | VAL TYR LEU | 1.02E-08 |
| biological process | retinol metabolic process                                | ASN VAL ILE | 1.23E-09 |
| biological process | retinol metabolic process                                | PHE LYS VAL | 5.29E-10 |
| biological process | negative regulation of lipid catabolic process           | CYS VAL LEU | 9.22E-11 |
| biological process | flagellar cell motility                                  | GLU PHE ILE | 5.97E-08 |
| biological process | flagellar cell motility                                  | THR ILE ARG | 2.29E-08 |
| biological process | cellular amino acid biosynthetic process                 | ALA VAL ILE | 7.56E-08 |
| biological process | cellular amino acid biosynthetic process                 | ALA LYS LEU | 5.25E-08 |
| biological process | cellular amino acid biosynthetic process                 | GLU ALA ILE | 8.87E-08 |
| biological process | cellular amino acid biosynthetic process                 | GLU ALA VAL | 1.06E-07 |
| biological process | cellular amino acid biosynthetic process                 | ALA VAL LEU | 1.82E-09 |
| biological process | cellular amino acid biosynthetic process                 | GLU LEU ILE | 6.03E-08 |
| biological process | cellular amino acid biosynthetic process                 | GLU ALA LEU | 3.44E-13 |
| biological process | cellular amino acid biosynthetic process                 | ALA LEU ILE | 2.80E-09 |
| biological process | cytolysis                                                | ASN ALA ILE | 1.04E-08 |
| biological process | cytolysis                                                | ALA VAL ARG | 1.61E-11 |
| biological process | cytolysis                                                | ALA ILE ARG | 1.23E-08 |
| biological process | cytolysis                                                | CYS ALA LEU | 1.72E-23 |
| biological process | cytolysis                                                | GLU ALA LYS | 4.73E-08 |

|                    |                                                           |             |          |
|--------------------|-----------------------------------------------------------|-------------|----------|
| biological process | negative regulation of glycogen catabolic process         | CYS VAL LEU | 9.22E-11 |
| biological process | positive regulation of cytokine secretion                 | CYS VAL LEU | 2.51E-10 |
| biological process | negative regulation of protein catabolic process          | CYS VAL LEU | 1.87E-11 |
| biological process | regulation of insulin secretion                           | CYS VAL LEU | 8.58E-11 |
| biological process | positive regulation of glycolytic process                 | CYS VAL LEU | 4.05E-10 |
| biological process | positive regulation of insulin receptor signaling pathway | CYS VAL LEU | 9.22E-11 |
| biological process | steroid metabolic process                                 | PHE THR LEU | 1.11E-07 |
| biological process | wound healing                                             | CYS VAL LEU | 5.72E-09 |
| biological process | positive regulation of glycogen biosynthetic process      | CYS VAL LEU | 8.58E-11 |
| biological process | positive regulation of MAPK cascade                       | CYS VAL LEU | 3.75E-12 |
| biological process | phosphorylation                                           | GLU ALA ILE | 2.42E-08 |
| biological process | phosphorylation                                           | ALA THR ILE | 1.12E-07 |
| biological process | phosphorylation                                           | GLU LEU ILE | 5.51E-10 |
| biological process | phosphorylation                                           | GLU VAL LEU | 4.86E-08 |
| biological process | response to freezing                                      | ASP ILE ARG | 1.16E-07 |
| biological process | glucose homeostasis                                       | CYS VAL LEU | 1.43E-09 |
| biological process | regulation of cellular amino acid metabolic process       | ALA TYR LEU | 7.35E-08 |
| biological process | regulation of cellular amino acid metabolic process       | CYS VAL LEU | 1.87E-11 |
| biological process | growth                                                    | ALA VAL ARG | 3.85E-10 |
| biological process | growth                                                    | ASP LEU ARG | 3.95E-09 |
| biological process | positive regulation of cell differentiation               | CYS VAL LEU | 4.05E-10 |
| biological process | methylation                                               | GLU LEU ARG | 3.20E-08 |
| biological process | methylation                                               | GLU ALA LEU | 8.74E-10 |
| biological process | metabolic process                                         | ALA LYS LEU | 7.60E-08 |
| biological process | metabolic process                                         | CYS ALA LEU | 6.17E-08 |
| biological process | metabolic process                                         | ALA LEU ARG | 1.63E-12 |
| biological process | metabolic process                                         | ASN ALA LEU | 1.52E-09 |
| biological process | metabolic process                                         | ALA THR LEU | 1.89E-12 |
| biological process | metabolic process                                         | GLU LEU ARG | 5.04E-17 |
| biological process | metabolic process                                         | ALA PHE ILE | 1.01E-08 |
| biological process | metabolic process                                         | ALA THR VAL | 1.67E-09 |
| biological process | metabolic process                                         | ALA VAL ARG | 2.88E-26 |
| biological process | metabolic process                                         | GLU ALA ARG | 4.06E-11 |
| biological process | metabolic process                                         | GLU ALA LYS | 3.41E-13 |
| biological process | metabolic process                                         | GLU ALA LEU | 2.60E-20 |

|                    |                                                                            |             |          |
|--------------------|----------------------------------------------------------------------------|-------------|----------|
| biological process | metabolic process                                                          | ALA VAL TYR | 1.34E-08 |
| biological process | metabolic process                                                          | ALA LEU ILE | 4.43E-08 |
| biological process | metabolic process                                                          | ASP VAL ILE | 8.57E-08 |
| biological process | metabolic process                                                          | ALA ASP ILE | 6.95E-16 |
| biological process | metabolic process                                                          | ALA ILE ARG | 7.02E-14 |
| biological process | positive regulation of brown fat cell differentiation                      | CYS VAL LEU | 9.22E-11 |
| biological process | negative regulation of proteolysis                                         | CYS VAL LEU | 1.87E-11 |
| biological process | endocrine pancreas development                                             | CYS VAL LEU | 8.58E-11 |
| biological process | carbohydrate metabolic process                                             | GLU ALA ILE | 1.15E-07 |
| biological process | carbohydrate metabolic process                                             | GLU ALA VAL | 4.79E-09 |
| biological process | carbohydrate metabolic process                                             | GLU ALA LEU | 6.50E-11 |
| biological process | negative regulation of respiratory burst involved in inflammatory response | CYS VAL LEU | 9.22E-11 |
| biological process | oxygen transport                                                           | ALA THR VAL | 2.50E-09 |
| biological process | oxygen transport                                                           | ALA LEU HIS | 1.46E-10 |
| biological process | oxygen transport                                                           | ALA PHE LYS | 5.23E-09 |
| biological process | oxygen transport                                                           | PHE LYS LEU | 1.75E-16 |
| biological process | oxygen transport                                                           | PHE LYS VAL | 3.14E-10 |
| biological process | acute-phase response                                                       | CYS VAL LEU | 7.22E-11 |
