# Supplementary material for: Mining the entire Protein DataBank for frequent spatially cohesive amino acid patterns
Source: Springer Nature journal article supplement (doi:10.1186/s13040-015-0038-4), 2015-01-30
Supplement: 13040_2015_38_MOESM8_ESM.pdf [file 13040_2015_38_MOESM8_ESM.pdf]

**Additional file 5:** Mined amino acid FreSCOs significantly correlated with optimal growth temperature.

Mined FreSCOs found to be significant correlated with high OGT. Significance cut-off was 3.84E-5.

| FreSCO      | P-value   |
|-------------|-----------|
| GLU LYS VAL | 1.34E-100 |
| GLU LYS LEU | 2.30E-100 |
| GLU LYS ILE | 4.37E-90  |
| GLU LYS ARG | 3.74E-82  |
| LYS VAL ARG | 1.09E-73  |
| LYS ILE ARG | 2.12E-66  |
| LYS LEU ARG | 3.03E-66  |
| LYS VAL ILE | 7.00E-64  |
| LYS VAL LEU | 1.00E-61  |
| GLU GLY LYS | 2.21E-55  |
| GLU ALA LYS | 1.56E-49  |
| GLU PHE LYS | 1.11E-47  |
| LYS LEU ILE | 3.44E-47  |
| GLY LYS ARG | 6.28E-46  |
| GLU LYS ASP | 4.64E-42  |
| GLU VAL ARG | 5.77E-42  |
| LYS VAL TYR | 1.93E-39  |
| LYS TYR LEU | 6.34E-39  |
| PHE LYS LEU | 8.58E-39  |
| GLU ILE ARG | 8.43E-37  |
| GLY LYS LEU | 1.54E-36  |
| GLU LEU ARG | 1.75E-36  |
| GLU LYS SER | 1.89E-35  |
| ALA LYS ARG | 2.01E-34  |
| GLU VAL ILE | 5.52E-34  |
| GLY LYS VAL | 2.44E-32  |
| GLY LYS ILE | 1.97E-31  |
| LEU ILE ARG | 4.25E-30  |
| LYS PRO LEU | 7.53E-28  |
| GLU LEU ILE | 1.20E-26  |
| GLU VAL LEU | 2.76E-26  |
| GLU THR LYS | 7.82E-25  |
| LYS SER ILE | 2.49E-24  |
| ALA LYS VAL | 2.75E-24  |
| ALA LYS ILE | 5.02E-24  |
| VAL ILE ARG | 2.43E-23  |
| LYS ASP VAL | 2.61E-23  |
| ALA LYS LEU | 2.04E-22  |

|             |          |
|-------------|----------|
| PHE LYS VAL | 8.06E-22 |
| GLU TYR LEU | 1.52E-21 |
| GLU GLY ILE | 1.27E-20 |
| GLU PHE ILE | 2.95E-19 |
| VAL LEU ILE | 7.25E-19 |
| GLU PHE ARG | 1.25E-18 |
| LYS ASP LEU | 1.34E-18 |
| GLU GLY ARG | 1.49E-18 |
| LYS VAL SER | 1.89E-18 |
| GLU GLY VAL | 1.38E-17 |
| GLU PHE LEU | 1.42E-17 |
| GLU VAL TYR | 1.69E-17 |
| ASN LYS LEU | 3.11E-17 |
| GLU PHE VAL | 4.96E-17 |
| GLU GLY LEU | 2.00E-16 |
| GLU PRO VAL | 1.24E-15 |
| GLU ASP VAL | 3.98E-15 |
| LYS ASP ILE | 4.08E-14 |
| VAL TYR ILE | 5.69E-14 |
| GLU PRO LEU | 1.00E-13 |
| VAL LEU ARG | 7.97E-13 |
| THR LYS ILE | 2.24E-12 |
| GLU ALA ARG | 7.21E-12 |
| PRO LEU ILE | 1.37E-11 |
| VAL TYR LEU | 2.20E-11 |
| GLU ALA ILE | 1.38E-10 |
| ASN GLU LEU | 1.44E-10 |
| PRO VAL ILE | 2.95E-10 |
| GLU ASP LEU | 7.04E-10 |
| LYS LEU SER | 1.01E-09 |
| GLY LYS ASP | 1.20E-09 |
| GLY ILE ARG | 1.30E-09 |
| TYR LEU ILE | 1.62E-09 |
| PHE LEU ILE | 2.07E-09 |
| GLY THR LYS | 5.85E-09 |
| ASN GLU VAL | 9.85E-09 |
| GLU ASP ARG | 2.32E-08 |
| ALA ILE ARG | 4.37E-08 |
| GLU ASP ILE | 9.22E-08 |
| PRO VAL LEU | 1.01E-07 |
| ALA GLY LYS | 1.15E-07 |
| GLU ALA LEU | 1.29E-07 |
| PHE VAL ILE | 1.35E-07 |
| GLY LYS SER | 1.39E-07 |
| PHE VAL ARG | 2.31E-07 |

|             |          |
|-------------|----------|
| GLU PHE GLY | 5.56E-07 |
| PHE LEU ARG | 8.93E-07 |
| ALA PHE LYS | 8.97E-07 |
| GLU ALA VAL | 9.13E-07 |
| GLY VAL ARG | 1.25E-06 |
| THR LYS LEU | 1.62E-06 |
| GLY VAL ILE | 2.44E-06 |
| TYR LEU ARG | 3.00E-06 |
| ASN LEU ARG | 1.13E-05 |
| GLU SER ILE | 1.26E-05 |
| GLY LEU ILE | 1.32E-05 |
| GLU SER ARG | 2.17E-05 |

Mined FreSCOs found to be significant correlated with low OGT. Significance cut-off was 3.84E-5.

| FreSCO      | P-value  |
|-------------|----------|
| ALA THR ASP | 3.27E-55 |
| ALA ASP SER | 2.64E-45 |
| THR LEU GLN | 5.69E-45 |
| ASP LEU GLN | 2.57E-40 |
| ALA GLY ASP | 9.03E-36 |
| ALA GLY GLN | 1.37E-34 |
| LEU GLN SER | 3.94E-32 |
| GLY LEU GLN | 6.54E-30 |
| ALA LEU GLN | 2.38E-26 |
| ALA VAL GLN | 4.38E-25 |
| ALA THR SER | 4.40E-25 |
| GLY THR ASP | 2.11E-23 |
| ALA PHE THR | 1.66E-21 |
| GLY VAL GLN | 1.79E-19 |
| ALA PHE SER | 1.76E-18 |
| GLY ASP SER | 1.05E-17 |
| VAL LEU GLN | 5.59E-17 |
| ALA THR LEU | 6.48E-17 |
| ALA GLY SER | 6.89E-17 |
| ALA PHE ASP | 1.86E-16 |
| ALA GLN ILE | 5.72E-16 |
| LEU GLN ARG | 1.23E-15 |
| GLU ALA THR | 2.56E-14 |
| ALA ASP LEU | 4.12E-14 |
| ALA GLY THR | 7.89E-14 |
| GLU ALA GLN | 1.63E-13 |
| THR ASP LEU | 3.35E-13 |

|             |          |
|-------------|----------|
| CYS ALA LEU | 5.11E-13 |
| THR ASP ILE | 1.60E-11 |
| GLY THR SER | 1.97E-11 |
| ALA THR VAL | 4.89E-11 |
| GLY THR LEU | 1.15E-10 |
| ASP LEU SER | 2.12E-10 |
| THR ASP VAL | 3.47E-10 |
| THR LEU SER | 4.16E-10 |
| ALA ASP ILE | 2.74E-09 |
| VAL GLN ILE | 9.34E-09 |
| GLU THR SER | 2.63E-08 |
| ASN THR LEU | 2.86E-08 |
| PHE THR VAL | 3.27E-08 |
| ALA THR ARG | 3.51E-08 |
| PHE THR LEU | 5.03E-08 |
| ASN LEU SER | 2.03E-07 |
| LEU GLN ILE | 2.43E-07 |
| ALA ASP VAL | 3.35E-07 |
| GLU LEU GLN | 6.17E-06 |
| ALA GLY TYR | 7.48E-06 |
| ALA LEU SER | 1.13E-05 |
| ALA ASP ARG | 2.64E-05 |
