# Supplementary material for: Mining the entire Protein DataBank for frequent spatially cohesive amino acid patterns
Source: Springer Nature journal article supplement (doi:10.1186/s13040-015-0038-4), 2015-01-30
Supplement: 13040_2015_38_MOESM9_ESM.pdf [file 13040_2015_38_MOESM9_ESM.pdf]

**Additional file 6:** Spearman correlation of occurrence of individual amino acids in a protein and the associated OGT. Negative correlation means the amino acid is more frequent in proteins associated with a low OGT, positive correlation with high OGT.

| Amino acid | Correlation | P-value   |
|------------|-------------|-----------|
| GLN        | -0.147      | 6.51E-104 |
| ASP        | -0.123      | 1.08E-73  |
| THR        | -0.113      | 1.56E-61  |
| HIS        | -0.105      | 1.33E-53  |
| ALA        | -0.0861     | 1.29E-36  |
| SER        | -0.0685     | 8.98E-24  |
| ASN        | -0.0537     | 3.60E-15  |
| TRP        | -0.0356     | 1.89E-07  |
| PHE        | -0.0171     | 1.22E-02  |
| CYS        | -0.00364    | 0.594     |
| UNK        | -0.00246    | 0.718     |
| PRO        | -0.00165    | 0.808     |
| MET        | 0.0126      | 0.0702    |
| LEU        | 0.0274      | 5.93E-05  |
| TYR        | 0.0293      | 1.78E-05  |
| ILE        | 0.0296      | 1.44E-05  |
| GLY        | 0.0399      | 5.04E-09  |
| ARG        | 0.0719      | 5.61E-26  |
| VAL        | 0.0895      | 2.08E-39  |
| LYS        | 0.104       | 2.30E-52  |
| GLU        | 0.127       | 1.94E-78  |
