# Supplementary material for: Mining the entire Protein DataBank for frequent spatially cohesive amino acid patterns
Source: Springer Nature journal article supplement (doi:10.1186/s13040-015-0038-4), 2015-01-30
Supplement: 13040_2015_38_MOESM10_ESM.pdf [file 13040_2015_38_MOESM10_ESM.pdf]

**Additional file 7:** Overview of the significance of the found amino acid-base FreSCOs in the protein-DNA complex structure dataset. Frequency and cohesion radius of the significant amino acid-base patterns. P-value based on the cohesion radius of the same FreSCOs in permuted DNA-protein structures.

| FreSCO       | Frequency | Cohesion radius | P-value   |
|--------------|-----------|-----------------|-----------|
| DT GLY ARG   | 0.939676  | 6.127467        | 2.97E-283 |
| DT GLY       | 0.939676  | 4.530339        | 4.51E-266 |
| DT GLY SER   | 0.935195  | 6.155224        | 1.95E-209 |
| DT THR GLY   | 0.935195  | 6.386277        | 2.00E-158 |
| DT GLY ALA   | 0.936574  | 6.389396        | 1.46E-108 |
| DT SER       | 0.943123  | 4.683291        | 9.63E-100 |
| DA DT DG SER | 0.89314   | 6.752896        | 4.90E-97  |
| DT LYS ASN   | 0.940021  | 6.627604        | 1.00E-92  |
| DC DA DG SER | 0.892106  | 6.796654        | 3.98E-86  |
| DT LYS SER   | 0.942778  | 6.13308         | 8.37E-82  |
| DA DT DG ARG | 0.896932  | 6.617025        | 4.68E-79  |
| DT ARG SER   | 0.943123  | 6.229689        | 2.21E-78  |
| DC GLY ARG   | 0.922096  | 6.308396        | 7.48E-78  |
| DC GLY       | 0.922096  | 4.890112        | 9.94E-75  |
| DT THR SER   | 0.939676  | 6.496252        | 1.35E-71  |
| DT SER ASN   | 0.937608  | 6.809997        | 2.21E-61  |
| DT LYS THR   | 0.942778  | 6.349891        | 4.12E-58  |
| DA DT DG GLY | 0.889004  | 6.7881          | 1.08E-57  |
| DC THR GLY   | 0.916925  | 6.672068        | 6.23E-54  |
| DC DT GLY    | 0.895209  | 6.047739        | 9.24E-54  |
| DC LYS GLY   | 0.921751  | 6.251711        | 2.82E-53  |
| DC LYS THR   | 0.924509  | 6.524064        | 2.54E-51  |
| DA DT GLY    | 0.896932  | 6.10275         | 4.48E-50  |
| DT LYS GLY   | 0.939331  | 6.169234        | 3.84E-49  |
| DT ASN       | 0.940021  | 5.325566        | 1.60E-48  |
| DT GLY PRO   | 0.927956  | 6.920673        | 3.68E-47  |
| DT LYS ARG   | 0.94726   | 6.160239        | 8.12E-46  |
| DC LYS ARG   | 0.929679  | 6.166498        | 5.97E-43  |
| DC THR ARG   | 0.924853  | 6.571643        | 1.42E-41  |
| DT GLY ASN   | 0.932092  | 6.922134        | 8.47E-40  |
| DT GLN SER   | 0.932092  | 6.923004        | 3.25E-39  |
| DC SER       | 0.924509  | 4.8843          | 5.42E-38  |
| DC GLY SER   | 0.91658   | 6.414189        | 6.40E-37  |
| DC DA DG GLY | 0.889004  | 6.89531         | 1.27E-36  |
| DT ILE GLY   | 0.930024  | 6.582475        | 1.31E-36  |
| DA DT ASN    | 0.897277  | 6.770477        | 2.05E-35  |
| DA DT DG     | 0.905895  | 2.950319        | 3.32E-35  |
| DC LYS SER   | 0.924164  | 6.348909        | 6.06E-35  |
| DA DG SER    | 0.903137  | 6.234865        | 7.44E-35  |

|              |          |          |          |
|--------------|----------|----------|----------|
| DC DA DG ARG | 0.896932 | 6.716098 | 1.80E-34 |
| DT THR ARG   | 0.943123 | 6.482018 | 1.86E-33 |
| DC ARG ASN   | 0.921751 | 6.755637 | 4.72E-33 |
| DA DG ARG    | 0.907963 | 6.089308 | 1.35E-32 |
| DT ARG ASN   | 0.940021 | 6.777521 | 8.04E-32 |
| DC ARG SER   | 0.924509 | 6.374127 | 8.82E-32 |
| DC THR SER   | 0.921062 | 6.683413 | 5.35E-31 |
| DT THR ASN   | 0.936574 | 6.987177 | 6.83E-31 |
| DA DT SER    | 0.901413 | 6.211182 | 2.70E-30 |
| DC DA DT GLY | 0.882799 | 6.885953 | 1.73E-29 |
| DT ILE ASN   | 0.932437 | 6.976099 | 2.03E-29 |
| DA DT ARG    | 0.905205 | 6.074988 | 5.85E-28 |
| DT THR       | 0.947949 | 5.079601 | 8.54E-28 |
| DC DT DG SER | 0.890038 | 6.941497 | 1.41E-24 |
| DT GLY VAL   | 0.931058 | 6.621836 | 5.37E-24 |
| DC LYS ASN   | 0.921751 | 6.834252 | 9.23E-24 |
| DT ILE SER   | 0.935884 | 6.674606 | 2.59E-22 |
| DC DT DG GLY | 0.886936 | 6.9326   | 1.28E-21 |
| DT ILE THR   | 0.934161 | 6.804892 | 6.87E-20 |
| DA DG GLY    | 0.900034 | 6.276371 | 1.78E-19 |
| DC DG SER    | 0.906929 | 6.245179 | 2.35E-19 |
| DC DG GLY    | 0.904516 | 6.2695   | 3.78E-19 |
| DC DT SER    | 0.898311 | 6.175282 | 4.97E-19 |
| DC DA DG LYS | 0.896932 | 6.751376 | 1.31E-18 |
| DC DA DT SER | 0.886936 | 6.945109 | 1.34E-18 |
| DC DT LYS    | 0.903137 | 6.000176 | 3.24E-18 |
| DC DA DT ARG | 0.890727 | 6.794205 | 1.55E-17 |
| DC ASN       | 0.921751 | 5.436475 | 2.21E-17 |
| DC DT ASN    | 0.895209 | 6.70148  | 2.88E-17 |
| DT ARG       | 0.947949 | 4.800107 | 5.10E-17 |
| DC ALA SER   | 0.923819 | 6.537923 | 6.55E-16 |
| DA DT DG LYS | 0.896932 | 6.803256 | 1.21E-15 |
| DT ALA SER   | 0.941744 | 6.558472 | 8.41E-15 |
| DA DG ASN    | 0.89969  | 6.87482  | 1.37E-14 |
| DC DT ARG    | 0.903137 | 6.04922  | 6.88E-14 |
| DC ARG       | 0.930369 | 4.857176 | 3.00E-13 |
| DT LYS       | 0.947949 | 4.771483 | 1.69E-12 |
| DA DT THR    | 0.905205 | 6.563358 | 2.11E-11 |
| DC DT DG ARG | 0.894864 | 6.807256 | 6.53E-11 |
| DT THR ALA   | 0.941055 | 6.664431 | 2.02E-10 |
| DT DG GLY    | 0.90555  | 6.277393 | 1.32E-09 |
| DT SER VAL   | 0.935884 | 6.714867 | 2.04E-09 |
| DC DG ASN    | 0.904516 | 6.776123 | 3.55E-09 |
| DA GLY ARG   | 0.918649 | 6.703545 | 6.01E-09 |
| DC DA DT LYS | 0.890727 | 6.8367   | 1.32E-08 |

|              |          |          |          |
|--------------|----------|----------|----------|
| DT DG ARG    | 0.913478 | 6.159504 | 1.71E-08 |
| DT DG SER    | 0.908652 | 6.307371 | 4.62E-08 |
| DT THR VAL   | 0.935195 | 6.820829 | 1.95E-07 |
| DA DT LYS    | 0.905205 | 6.185748 | 1.12E-06 |
| DC ILE GLY   | 0.911755 | 6.794858 | 1.49E-06 |
| DC GLY ALA   | 0.919683 | 6.691878 | 1.54E-06 |
| DC DT DG LYS | 0.894864 | 6.827585 | 1.73E-06 |
| DC DT THR    | 0.902792 | 6.529231 | 3.52E-06 |
| DT ILE ARG   | 0.937608 | 6.724475 | 3.98E-06 |
| DC DG ARG    | 0.912789 | 6.13217  | 7.76E-06 |
